# Supplementary material for: Visible-light-promoted and chlorophyll-catalyzed aerobic desulfurization of thioamides to amides
Source: Royal Society of Chemistry journal article supplement (doi:10.1039/d2ra01930b), 2022-01-01
Supplement: d2ra01930b1.pdf [file d2ra01930b1.pdf]

## Visible-light-promoted and chlorophyll-catalyzed aerobic desulfurization of thioamides to amides

Zihui Yang<sup>a</sup>, Haoyi Zhou<sup>a</sup>, Lin Wang<sup>a</sup>, Jingxuan Zhang<sup>a</sup>, Hongqi Xie<sup>a, b</sup>,  
Yisong Liu<sup>a, b</sup>, Jianguo Zeng<sup>a, b</sup> and Pi Cheng<sup>\* a, b</sup>

<sup>a</sup> Hunan Key Laboratory of Traditional Chinese Veterinary Medicine, Hunan Agricultural University, Changsha, Hunan 410128, China

<sup>b</sup> College of Veterinary Medicine, Hunan Agricultural University, Changsha, Hunan 410128, China

Corresponding author: picheng@hunau.edu.cn; picheng55@126.com (P.C.)

## 1. General information

Column chromatography silica gel (200-300 mesh) and TLC plate were purchased from Qingdao Meijin Chemical Inc (Qingdao; China); HRMS data were obtained in the ESI mode on an Agilent 6530 Q-TOF/MS system.  $^1\text{H}$  NMR and  $^{13}\text{C}$  NMR spectra were recorded on Bruker 400 MHz spectrometer and chemical shifts were given in  $\delta$  with TMS as an internal reference.

## 2. General procedure for the synthesis compounds 2

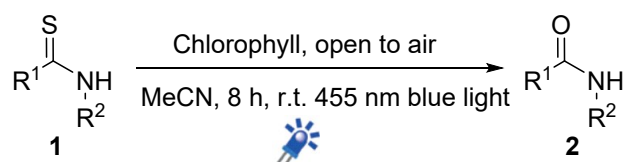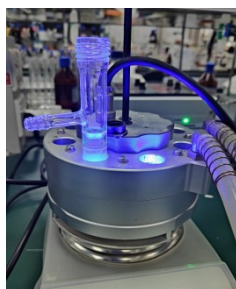

Scheme 1s.

A Schlenk tube equipped with a magnetic stir bar was charged with a mixture of thioamide **1** (0.3mmol) and 15 mg of chlorophyll a powder (5 mol%) and 3 mL MeCN. The tube was set on a RLH-18 photo reactor (Beijing Rogertech Ltd.) and irradiated by 10 W blue LED open to air. After irradiation at room temperature for 8 h, the LED light was removed, and the solvent was poured to 30 mL water and extracted with 30mL EtOAc for three times. The organic layer was then washed with 20mL water for three times and evaporated giving crude product, which was purified on silica gel chromatography and eluted with PE/EtOAc to give target compounds.

## 3. GC-MS analysis of model reaction

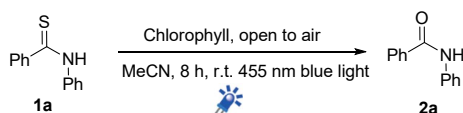

## Method

## ==== Analytical Line 1 =====

Column Oven Temp. :35.0 °C  
 Injection Temp. :250.00 °C  
 Injection Mode :Splitless  
 Column Flow :2.02 mL/min  
 Split Ratio :-1.0  
 Oven Temp. Program

| Rate  | Temperature(°C) | Hold Time(min) |
|-------|-----------------|----------------|
| -     | 35.0            | 6.00           |
| 10.00 | 130.0           | 2.00           |
| 5.00  | 150.0           | 5.00           |
| 4.00  | 230.0           | 10.00          |

[GCMS-QP2010]  
 IonSourceTemp :230.00 °C  
 Interface Temp. :250.00 °C  
 质核比扫描范围: 45~500m/z

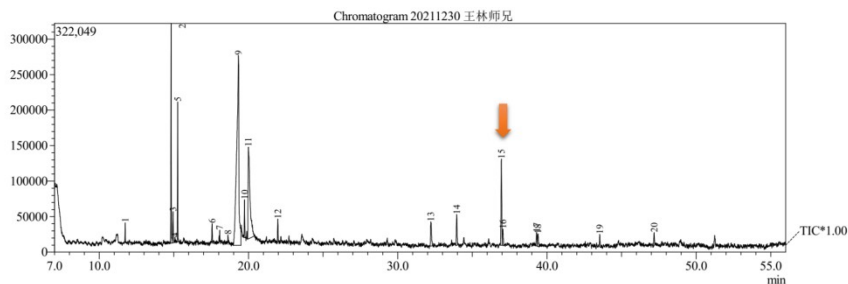

| Peak# | R.Time | Area    | Area%  | Height  | Height% | A/H Name                                             |
|-------|--------|---------|--------|---------|---------|------------------------------------------------------|
| 1     | 11.740 | 39609   | 0.63   | 26951   | 1.91    | 1.47 Furfural                                        |
| 2     | 14.814 | 492973  | 7.87   | 309493  | 21.89   | 1.59 Benzaldehyde                                    |
| 3     | 14.948 | 124063  | 1.98   | 43998   | 3.11    | 2.82 Cyclotetrasiloxane, octamethyl-                 |
| 4     | 15.079 | 15187   | 0.24   | 7093    | 0.50    | 2.14 1-Octen-3-ol                                    |
| 5     | 15.255 | 318576  | 5.09   | 196928  | 13.93   | 1.62 Benzonitrile                                    |
| 6     | 17.563 | 56252   | 0.90   | 25760   | 1.82    | 2.18 Benzoic acid, methyl ester                      |
| 7     | 18.071 | 25659   | 0.41   | 16044   | 1.13    | 1.60 Cyclopentasiloxane, decamethyl-                 |
| 8     | 18.626 | 20735   | 0.33   | 11114   | 0.79    | 1.87 Cyclotrisiloxane, hexamethyl-                   |
| 9     | 19.325 | 2802754 | 44.74  | 267408  | 18.91   | 10.48 Benzoic acid                                   |
| 10    | 19.736 | 115550  | 1.84   | 53355   | 3.77    | 2.17 Octanoic acid, ethyl ester                      |
| 11    | 19.996 | 1150384 | 18.36  | 129163  | 9.14    | 8.91 Ethanone, 2,2-dihydroxy-1-phenyl-               |
| 12    | 21.969 | 74260   | 1.19   | 32422   | 2.29    | 2.29 Cyclotetrasiloxane, octamethyl-                 |
| 13    | 32.227 | 151355  | 2.42   | 34057   | 2.41    | 4.44 3H-1,2-Benzodithiol-3-one                       |
| 14    | 33.957 | 144270  | 2.30   | 43216   | 3.06    | 3.34 Asarone                                         |
| Peak# | R.Time | Area    | Area%  | Height  | Height% | A/H Name                                             |
| 15    | 36.948 | 400517  | 6.39   | 121571  | 8.60    | 3.29 Sulfurous acid                                  |
| 16    | 37.047 | 79150   | 1.26   | 23086   | 1.63    | 3.43 Hexadecane                                      |
| 17    | 39.314 | 67652   | 1.08   | 19052   | 1.35    | 3.55 Benzoxazole, 2-phenyl-                          |
| 18    | 39.395 | 73216   | 1.17   | 17625   | 1.25    | 4.15 Cyclononasiloxane, octadecamethyl-              |
| 19    | 43.540 | 51788   | 0.83   | 17483   | 1.24    | 2.96 Octasiloxane, 1,1,3,3,5,5,7,7,9,9,11,11,13,13,1 |
| 20    | 47.184 | 60205   | 0.96   | 18068   | 1.28    | 3.33 Cyclononasiloxane, octadecamethyl-              |
|       |        | 6264155 | 100.00 | 1413887 | 100.00  |                                                      |

## 4. Spectra data of compounds 2

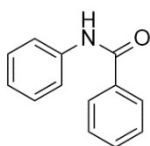

Compound **2a**, obtained as white solid,  $^1\text{H}$  NMR (400 MHz,  $\text{CDCl}_3$ ):  $\delta$  7.99 (s, 1H), 7.89-7.88 (m, 2H), 7.67 (d,  $J=8\text{Hz}$ , 2H), 7.58-7.54 (m, 1H), 7.51-7.46 (m, 2H), 7.40-7.36 (m, 2H), 7.19-7.12 (m, 1H).  $^{13}\text{C}$  NMR (100 MHz,  $\text{CDCl}_3$ ):  $\delta$  165.8, 137.9, 135.0, 131.8, 129.1( $\times 2$ ), 128.8( $\times 2$ ), 127.1( $\times 2$ ), 124.6, 120.3( $\times 2$ ). HRMS (ESI $^+$ ): calcd 198.0913 for

$C_{13}H_{12}NO^+$   $[M+H]^+$ ; Found, 198.0913. Data were consistent with those previously reported<sup>1</sup>.

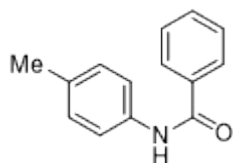

Compound **2b**, obtained as white solid,  $^1H$  NMR (400 MHz,  $CDCl_3$ ):  $\delta$  8.26 (s, 1H), 7.86-7.84 (m, 2H), 7.56-7.49 (m, 3H), 7.44-7.39 (m, 2H), 7.22 (d,  $J = 8.4$ Hz, 2H), 2.35 (s, 3H).  $^{13}C$  NMR (100 MHz,  $CDCl_3$ ):  $\delta$  166.02, 135.49, 135.47, 135.05, 134.16, 131.62, 129.49( $\times 2$ ), 128.64, 128.62, 127.14, 127.12, 120.62, 120.58, 20.94. HRMS (ESI<sup>+</sup>): calcd 212.1070 for  $C_{14}H_{14}NO^+[M+H]^+$ ; Found, 212.1070. Data were consistent with those previously reported<sup>2</sup>.

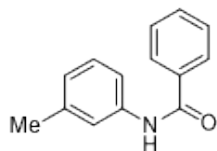

Compound **2c**, obtained as white solid,  $^1H$  NMR (400 MHz,  $CDCl_3$ ):  $\delta$  7.91-7.86 (m, 4H), 7.59-7.55 (m, 1H), 7.51-7.47 (m, 2H), 7.23 (s, 1H), 7.17-7.13 (m, 1H), 2.33 (s, 3H).  $^{13}C$  NMR (100 MHz,  $CDCl_3$ ):  $\delta$  165.82, 135.79, 134.94, 131.81, 130.58, 129.87, 128.78( $\times 2$ ), 127.14( $\times 2$ ), 126.81, 125.51, 123.56, 17.78. HRMS (ESI<sup>+</sup>): calcd 212.1070 for  $C_{14}H_{14}NO^+[M+H]^+$ ; Found, 212.1070. Data were consistent with those previously reported<sup>1</sup>.

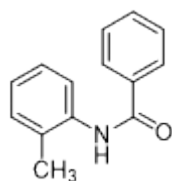

Compound **2d**, obtained as white solid,  $^1H$  NMR (400 MHz,  $CDCl_3$ ):  $\delta$  8.42 (s, 1H), 7.86-7.85 (m, 2H), 7.54-7.46 (m, 3H), 7.42-7.38 (m, 2H), 7.22 (t,  $J = 8$ Hz, 2H), 6.97 (d,  $J = 7.6$ Hz, 1H), 2.32 (s, 3H).  $^{13}C$  NMR (100 MHz,  $CDCl_3$ ):  $\delta$  166.21, 138.85, 138.01, 135.02, 131.67, 128.78, 128.61( $\times 2$ ), 127.20( $\times 2$ ), 125.36, 121.28, 117.73, 21.47. HRMS (ESI<sup>+</sup>): calcd 212.1070 for  $C_{14}H_{14}NO^+[M+H]^+$ ; Found, 212.1070. Data were consistent with those previously reported<sup>1</sup>.

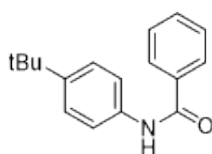

Compound **2e**, obtained as white solid,  $^1H$  NMR (400 MHz,  $CDCl_3$ ):  $\delta$  7.84 (s, 1H), 7.85-7.82 (m, 2H), 7.71 (d,  $J = 7.2$ Hz, 2H), 7.43-7.40 (m, 2H), 7.35-7.31 (m, 2H), 7.17-7.12 (m, 1H), 1.36 (s, 9H).

$^{13}\text{C}$  NMR (100 MHz,  $\text{CDCl}_3$ ):  $\delta$  166.21, 155.21, 138.27, 132.05, 128.95( $\times 2$ ), 127.14( $\times 2$ ), 125.63( $\times 2$ ), 124.38, 120.62( $\times 2$ ), 34.96, 31.20( $\times 3$ ). HRMS (ESI $^+$ ): calcd 254.1539 for  $\text{C}_{17}\text{H}_{20}\text{NO}^+[\text{M}+\text{H}]^+$ ; Found, 254.1542.

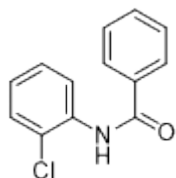

Compound **2f**, obtained as white solid,  $^1\text{H}$  NMR (400 MHz,  $\text{CDCl}_3$ ):  $\delta$  8.68 (d,  $J = 22$  Hz, 1H), 7.82-7.76 (m, 3H), 7.51-7.46 (m, 2H), 7.38-7.34 (m, 2H), 7.22-7.18 (m, 1H), 7.12-7.08 (m, 1H).  $^{13}\text{C}$  NMR (100 MHz,  $\text{CDCl}_3$ ):  $\delta$  166.60, 139.21, 134.51, 134.42, 131.99, 129.91, 128.65, 127.23, 127.21, 124.59, 120.85, 120.81, 118.81, 118.76. HRMS (ESI $^+$ ): calcd 232.0524 for  $\text{C}_{13}\text{H}_{11}\text{ClNO}^+[\text{M}+\text{H}]^+$ ; Found, 232.0520.

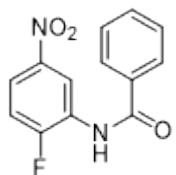

Compound **2g**, obtained as white solid,  $^1\text{H}$  NMR (400 MHz,  $\text{CDCl}_3$ ):  $\delta$  9.50, 9.49 (dd,  $J = 2.8\text{Hz}$ ,  $J = 6.8\text{Hz}$ , 1H), 8.19 (d,  $J = 2.4\text{Hz}$ , 1H), 8.07-8.03 (m, 1H), 7.94-7.92 (m, 2H), 7.67-7.62 (m, 1H), 7.58-7.54 (m, 2H), 7.34-7.28 (m, 1H).  $^{13}\text{C}$  NMR (100 MHz,  $\text{CDCl}_3$ ):  $\delta$  165.41, 155.61(d,  $^1J_{\text{F-C}} = 51.9\text{Hz}$ ), 144.63, 133.55, 132.76, 129.08( $\times 2$ ), 127.46(d,  $^2J_{\text{F-C}} = 11.5\text{Hz}$ ), 127.16( $\times 2$ ), 119.96(d,  $^3J_{\text{F-C}} = 9.2\text{Hz}$ ), 117.42(d,  $^4J_{\text{F-C}} = 3.2\text{Hz}$ ), 115.38(d,  $^2J_{\text{F-C}} = 22\text{Hz}$ ). HRMS (ESI $^+$ ): calcd 261.0670 for  $\text{C}_{13}\text{H}_{10}\text{FN}_2\text{O}_3^+[\text{M}+\text{H}]^+$ ; Found, 261.0679.

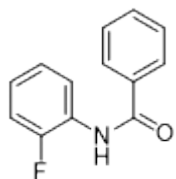

Compound **2h**, obtained as white solid,  $^1\text{H}$  NMR (400 MHz,  $\text{CDCl}_3$ ):  $\delta$  8.46-8.42 (m, 1H), 8.18 (s, 1H), 7.91-7.89 (m, 2H), 7.59-7.55 (m, 1H), 7.51-7.47 (m, 2H), 7.20-7.09 (m, 3H).  $^{13}\text{C}$  NMR (100 MHz,  $\text{CDCl}_3$ ):  $\delta$  165.54, 152.89(d,  $^1J_{\text{F-C}} = 241.6\text{Hz}$ ), 134.51, 132.09, 128.83( $\times 2$ ), 127.13( $\times 2$ ), 126.49(d,  $^2J_{\text{F-C}} = 10$  Hz), 124.66, 124.56(d,  $^2J_{\text{F-C}} = 3.7\text{Hz}$ ), 122.10, 114.87(d,  $^3J_{\text{F-C}} = 9.8\text{Hz}$ ). HRMS (ESI $^+$ ): calcd 216.0819 for  $\text{C}_{13}\text{H}_{11}\text{FNO}^+[\text{M}+\text{H}]^+$ ; Found, 216.0819.

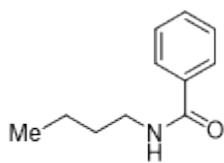

Compound **2i**, obtained as white solid,  $^1\text{H}$  NMR (400 MHz,  $\text{CDCl}_3$ ):  $\delta$  7.78-7.76 (m, 2H), 7.42-7.38 (m, 1H), 7.33-7.29 (m, 2H), 7.12 (t,  $J = 6\text{Hz}$ , 1H), 3.38-3.33 (m, 2H), 1.57-1.49 (m, 2H),

1.37-1.27 (m, 2H), 0.88 (t, 7.6 Hz, 3H).  $^{13}\text{C}$  NMR (100 MHz,  $\text{CDCl}_3$ ):  $\delta$  167.83, 134.80, 131.12, 128.32( $\times 2$ ), 127.01( $\times 2$ ), 39.85, 31.65, 20.14, 13.75. HRMS ( $\text{ESI}^+$ ): calcd 178.1226 for  $\text{C}_{11}\text{H}_{16}\text{NO}^+[\text{M}+\text{H}]^+$ ; Found, 178.1225. Data were consistent with those previously reported<sup>1</sup>.

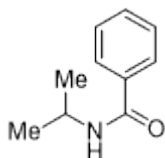

Compound **2j**, obtained as white solid,  $^1\text{H}$  NMR (400 MHz,  $\text{CDCl}_3$ ):  $\delta$  7.77-7.75 (m, 2H), 7.43-7.39 (m, 1H), 7.33 (t,  $J = 8\text{Hz}$ , 2H), 6.58 (d,  $J = 9.2\text{Hz}$ , 1H), 4.28-4.20 (m, 1H), 1.22(s, 3H), 1.20 (s, 3H).  $^{13}\text{C}$  NMR (100 MHz,  $\text{CDCl}_3$ ):  $\delta$  166.82, 134.96, 131.10, 128.33( $\times 2$ ), 126.96( $\times 2$ ), 41.83, 22.67( $\times 2$ ). HRMS ( $\text{ESI}^+$ ): calcd 164.1070 for  $\text{C}_{10}\text{H}_{14}\text{NO}^+[\text{M}+\text{H}]^+$ ; Found, 164.1071.

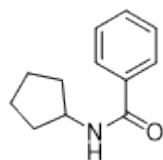

Compound **2k**, obtained as white solid,  $^1\text{H}$  NMR (400 MHz,  $\text{CDCl}_3$ ):  $\delta$  7.76-7.74 (m, 2H), 7.45-7.42 (m, 1H), 7.37-7.33 (m, 2H), 6.56 (d,  $J = 7.6\text{Hz}$ , 1H), 4.39-4.31 (m, 1H), 2.01-1.98 (m, 2H), 1.73-1.65 (m, 2H), 1.61-1.56 (m, 2H), 1.53-1.44 (m, 2H).  $^{13}\text{C}$  NMR (100 MHz,  $\text{CDCl}_3$ ):  $\delta$  167.3, 134.9, 131.2, 128.4( $\times 2$ ), 127.0( $\times 2$ ), 51.7, 33.0( $\times 2$ ), 23.8( $\times 2$ ). HRMS ( $\text{ESI}^+$ ): calcd 190.1226 for  $\text{C}_{12}\text{H}_{16}\text{NO}^+[\text{M}+\text{H}]^+$ ; Found, 190.1225.

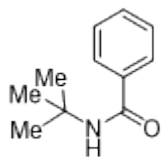

Compound **2l**, obtained as white solid,  $^1\text{H}$  NMR (400 MHz,  $\text{CDCl}_3$ ):  $\delta$  7.67-7.63 (m, 2H), 7.35-7.22 (m, 2H), 6.31 (d,  $J = 16.4\text{Hz}$ , 1H), 1.40-1.38 (m, 9H).  $^{13}\text{C}$  NMR (100 MHz,  $\text{CDCl}_3$ ):  $\delta$  167.0, 135.9, 130.9, 128.3( $\times 2$ ), 126.8( $\times 2$ ), 51.5, 28.8( $\times 3$ ). HRMS ( $\text{ESI}^+$ ): calcd 178.1226 for  $\text{C}_{11}\text{H}_{16}\text{NO}^+[\text{M}+\text{H}]^+$ ; Found, 178.1221.

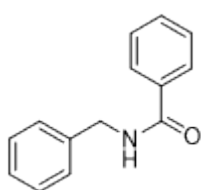

Compound **2m**, obtained as white solid,  $^1\text{H}$  NMR (400 MHz,  $\text{CDCl}_3$ ):  $\delta$  7.84-7.82 (m, 2H), 7.50-7.46 (m, 1H), 7.39-7.27 (m, 7H), 4.57 (d,  $J = 6\text{Hz}$ , 2H).  $^{13}\text{C}$  NMR (100 MHz,  $\text{CDCl}_3$ ):  $\delta$  167.70, 138.50, 134.41, 131.46, 128.65( $\times 2$ ), 128.49( $\times 2$ ), 127.74( $\times 2$ ), 127.38, 127.19( $\times 2$ ), 43.94. HRMS ( $\text{ESI}^+$ ): calcd 212.1070 for  $\text{C}_{14}\text{H}_{14}\text{NO}^+[\text{M}+\text{H}]^+$ ; Found, 212.1070. Data were consistent with those previously reported<sup>3</sup>.

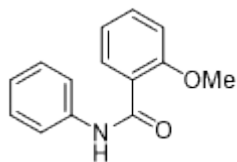

Compound **2n**, obtained as white solid,  $^1\text{H}$  NMR (400 MHz,  $\text{CDCl}_3$ ):  $\delta$  8.61-8.58 (m, 2H), 7.94-7.91 (m, 2H), 7.57-7.47 (m, 3H), 7.12-7.02 (m, 2H), 6.94-6.90 (m, 1H), 3.89 (s, 3H).  $^{13}\text{C}$  NMR (100 MHz,  $\text{CDCl}_3$ ):  $\delta$  165.22, 148.26, 135.27, 131.73, 128.77( $\times 2$ ), 127.81, 127.05( $\times 2$ ), 123.96, 121.11, 119.88, 110.03, 55.82. HRMS (ESI $^+$ ): calcd 228.1019 for  $\text{C}_{14}\text{H}_{14}\text{NO}_2^+[\text{M}+\text{H}]^+$ ; Found, 228.1021.

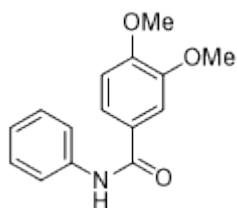

Compound **2o**, obtained as white solid,  $^1\text{H}$  NMR (400 MHz,  $\text{CDCl}_3$ ):  $\delta$  8.28 (s, 1H), 7.68-7.64 (m, 2H), 7.47 (d,  $J = 2.0$  Hz, 1H), 7.47, 7.42 (dd,  $J_1 = 2\text{Hz}$ ,  $J_2 = 8.4$  Hz, 1H), 7.35-7.31 (m, 2H), 7.15-7.11 (m, 1H), 6.80 (d,  $J = 8.4$  Hz, 1H), 3.89 (s, 3H), 3.84 (s, 3H).  $^{13}\text{C}$  NMR (100 MHz,  $\text{CDCl}_3$ ):  $\delta$  165.58, 151.97, 149.04, 138.22, 128.97( $\times 2$ ), 127.48, 124.34, 120.38( $\times 2$ ), 119.75, 110.75, 110.31, 55.99, 55.91. HRMS (ESI $^+$ ): calcd 258.1125 for  $\text{C}_{15}\text{H}_{16}\text{NO}_3^+[\text{M}+\text{H}]^+$ ; Found, 258.1125.

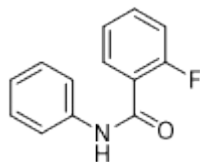

Compound **2p**, obtained as white solid,  $^1\text{H}$  NMR (400 MHz,  $\text{CDCl}_3$ ):  $\delta$  8.58 (d,  $J = 14$  Hz, 1H), 8.08 (td,  $J = 7.6$  Hz,  $J = 1.6\text{Hz}$ , 1H), 7.69 (d,  $J = 7.6$  Hz, 2H), 7.50-7.45 (m, 1H), 7.39-7.35 (m, 2H), 7.25 (td,  $J = 1.2$  Hz,  $J = 8$  Hz, 1H), 7.19-7.10 (m, 2H).  $^{13}\text{C}$  NMR (100 MHz,  $\text{CDCl}_3$ ):  $\delta$  161.53, 159.03, 137.80, 133.61(d,  $^3J_{\text{F-C}} = 2.1\text{Hz}$ ), 131.95(d,  $^4J_{\text{F-C}} = 2.1$  Hz), 129.04( $\times 2$ ), 124.97(d,  $^3J_{\text{F-C}} = 3.2$  Hz), 124.74, 121.67(d,  $^2J_{\text{F-C}} = 11.4$  Hz), 120.57( $\times 2$ ), 116.23(d,  $^1J_{\text{F-C}} = 24.6$  Hz). HRMS (ESI $^+$ ): calcd 216.0819 for  $\text{C}_{13}\text{H}_{11}\text{FNO}^+[\text{M}+\text{H}]^+$ ; Found, 216.0819.

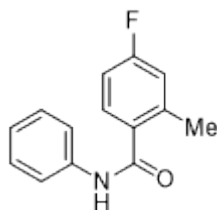

Compound **2q**, obtained as white solid,  $^1\text{H}$  NMR (400 MHz,  $\text{CDCl}_3$ ):  $\delta$  7.88 (s, 1H), 7.61 (d,  $J = 8$  Hz, 2H), 7.43-7.34 (m, 3H), 7.19-7.15 (m, 1H), 6.95-6.86 (m, 2H), 2.46 (s, 3H).  $^{13}\text{C}$  NMR (100 MHz,  $\text{CDCl}_3$ ):  $\delta$  167.37, 163.36(d,  $^1J_{\text{F-C}} = 248.3$  Hz), 139.68(d,  $^3J_{\text{F-C}} = 8.4$  Hz), 137.91, 132.55, 129.07( $\times 3$ ), 128.79(d,  $^3J_{\text{F-C}} = 8.9$  Hz), 124.67, 120.06, 117.95(d,  $^2J_{\text{F-C}} = 21.2$  Hz), 112.67(d,  $^2J_{\text{F-C}} = 21.4$  Hz), 19.93(d,  $^4J = 1.5$  Hz). HRMS

(ESI<sup>+</sup>): calcd 230.0976 for C<sub>14</sub>H<sub>13</sub>FNO<sup>+</sup>[M+H]<sup>+</sup>; Found, 230.0976.

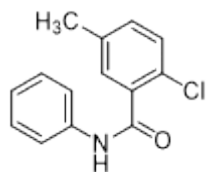

Compound **2r**, obtained as white solid, <sup>1</sup>H NMR (400 MHz, CDCl<sub>3</sub>): δ 8.11 (d, *J* = 1.2 Hz, 1H), 7.67-7.65 (m, 2H), 7.53 (d, *J* = 2.0 Hz, 1H), 7.40-7.36 (m, 2H), 7.31 (d, *J* = 8Hz, 1H), 7.21-7.16 (m, 2H), 2.36 (s, 3H). <sup>13</sup>C NMR (100 MHz, CDCl<sub>3</sub>): δ 164.74, 137.67, 137.37, 134.75, 132.40, 130.81, 130.06, 129.08(×2), 127.46, 124.76, 120.16(×2), 20.75. HRMS (ESI<sup>+</sup>): calcd 353.9100 for C<sub>13</sub>H<sub>10</sub>Br<sub>2</sub>NO<sup>+</sup>[M+H]<sup>+</sup>; Found, 355.9103. HRMS (ESI<sup>+</sup>): calcd 246.0680 for C<sub>14</sub>H<sub>13</sub>ClNO<sup>+</sup>[M+H]<sup>+</sup>; Found, 246.0678.

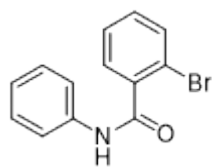

Compound **2s**, obtained as white solid, <sup>1</sup>H NMR (400 MHz, CDCl<sub>3</sub>): δ 8.31 (s, 1H), 7.64-7.61 (m, 2H), 7.55 (d, *J* = 8.0 Hz, 1H), 7.47 (d, *J* = 7.2Hz, 1H), 7.36-7.30 (m, 3H), 7.27-7.22 (m, 1H), 7.17 (t, *J* = 7.6 Hz, 1H). <sup>13</sup>C NMR (100 MHz, CDCl<sub>3</sub>): δ 165.97, 137.81, 137.72, 133.37, 131.44, 129.43, 129.02(×2), 127.56, 124.77, 120.29(×2), 119.41. HRMS (ESI<sup>+</sup>): calcd 276.0019 for C<sub>13</sub>H<sub>11</sub>BrNO<sup>+</sup>[M+H]<sup>+</sup>; Found, 276.0019.

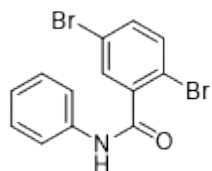

Compound **2t**, obtained as white solid, <sup>1</sup>H NMR (400 MHz, CDCl<sub>3</sub>): δ 8.00 (s, 1H), 7.71 (d, *J* = 2.0 Hz, 1H), 7.63-7.61 (m, 2H), 7.46 (d, *J* = 8.4 Hz, 1H), 7.42-7.36 (m, 3H), 7.22-7.18 (m, 1H). <sup>13</sup>C NMR (100 MHz, CDCl<sub>3</sub>): δ 164.19, 139.31, 137.24, 134.85, 134.49, 132.45, 129.15(×2), 125.14, 121.64, 120.27(×2), 118.01. HRMS (ESI<sup>+</sup>): calcd 353.9124 for C<sub>13</sub>H<sub>10</sub>Br<sub>2</sub>NO<sup>+</sup>[M+H]<sup>+</sup>; Found, 353.9124.

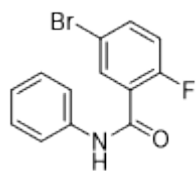

Compound **2u**, obtained as white solid, <sup>1</sup>H NMR (400 MHz, CDCl<sub>3</sub>): δ 8.42 (d, *J* = 14.8 Hz, 1H), 8.30, 8.29 (dd, *J* = 2.4Hz, *J* = 6.8Hz, 1H), 7.67-7.61 (m, 3H), 7.43-7.38 (m, 2H), 7.22-7.18 (m, 1H), 7.11, 7.11 (dd, *J* = 8.4 Hz, *J* = 11.2 Hz, 1H). <sup>13</sup>C NMR (100 MHz, CDCl<sub>3</sub>): δ 160.50, 159.83(d, <sup>1</sup>*J*<sub>F-C</sub> = 3.8 Hz), 158.05, 137.35, 136.44(d, <sup>3</sup>*J*<sub>F-C</sub> = 10 Hz), 134.90(d, <sup>3</sup>*J*<sub>F-C</sub> = 2.3 Hz), 129.15(×2), 125.09, 123.14(d, <sup>2</sup>*J*<sub>F-C</sub> = 12.8 Hz), 120.60, 118.18(d, <sup>2</sup>*J*<sub>F-C</sub> = 27



Hz). HRMS (ESI<sup>+</sup>): calcd 293.9924 for C<sub>13</sub>H<sub>10</sub>BrFNO<sup>+</sup>[M+H]<sup>+</sup>; Found, 293.9924.

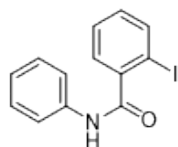

Compound **2v**, obtained as white solid, <sup>1</sup>H NMR (400 MHz, CDCl<sub>3</sub>): δ 7.88 (d, *J*=8.0 Hz, 2H), 7.64 (d, *J*= 7.6 Hz, 2H), 7.47-7.45 (m, 1H), 7.39-7.35 (m, 3H), 7.18 (t, *J* = 7.6 Hz, 1H), 7.14-7.10 (m, 1H). <sup>13</sup>C NMR (100 MHz, CDCl<sub>3</sub>): δ 167.40, 142.03, 139.97, 137.62, 131.42, 129.08(×2), 128.48, 128.28, 124.86, 120.23(×2), 92.49. HRMS (ESI<sup>+</sup>): calcd 323.9880 for C<sub>13</sub>H<sub>11</sub>I<sup>+</sup>[M+H]<sup>+</sup>; Found, 323.9884.

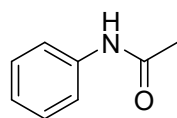

Compound **2w**, obtained as white solid, <sup>1</sup>H NMR (400 MHz, CDCl<sub>3</sub>): δ 7.54 (d, *J* = 8Hz, 2H), 7.30 (t, *J* = 8Hz, 2H), 7.11 (t, *J* = 8Hz, 1H), 2.16 (s, 3H). <sup>13</sup>C NMR (100 MHz, CDCl<sub>3</sub>): δ 169.2, 138.1, 128.8(×2), 124.3, 120.3(×2), 24.4. HRMS (ESI<sup>+</sup>): calcd 136.0757 for C<sub>8</sub>H<sub>10</sub>NO<sup>+</sup> [M+H]<sup>+</sup>; Found, 136.0757. Data were consistent with those previously reported<sup>1</sup>.

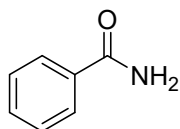

Compound **2x**, Obtained as white solid, <sup>1</sup>H NMR (400MHz, CDCl<sub>3</sub>): δ 7.84(d, *J* = 8.5 Hz, 2H), 7.54(t, *J* = 8.5 Hz, 1H), 7.46(t, *J* = 8.6 Hz, 2H), 6.34(s, 2H), <sup>13</sup>C NMR (100MHz, CDCl<sub>3</sub>): δ 169.8, 133.3, 132.0, 128.6(2), 127.4(2). HRMS (ESI<sup>+</sup>): calcd 122.0600 for C<sub>7</sub>H<sub>8</sub>NO<sup>+</sup> [M+H]<sup>+</sup>; found, 122.0601.

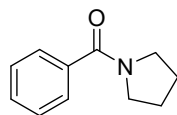

Compound **2y**, Obtained as colorless oil, <sup>1</sup>H NMR (400MHz, CDCl<sub>3</sub>): δ 7.34(dd, *J* = 8.6 Hz, 2H), 7.20(dd, *J* = 8.5 Hz, 3H), 3.45(t, *J* = 8.6 Hz, 2H), 3.22(t, *J* = 8.6 Hz, 2H), 1.77-1.71(m, 2H), 1.67-1.61(m, 2H), <sup>13</sup>C NMR (100MHz, CDCl<sub>3</sub>): δ 169.4, 137.1, 129.6, 128.0(×2), 126.9(×2), 49.4, 46.0, 26.2, 24.3. HRMS (ESI<sup>+</sup>): calcd 176.1070 for C<sub>11</sub>H<sub>14</sub>NO [M+H]<sup>+</sup>; found, 176.1072

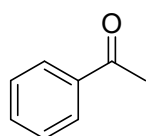

Compound **5**, Obtain as the yellow oil, <sup>1</sup>H NMR (400 MHz, CDCl<sub>3</sub>): δ 7.99-7.97 (m, 2H), 7.60-7.56 (m, 1H), 7.50-7.46 (m, 2H), 2.62 (s, 3H).

$^{13}\text{C}$  NMR (100 MHz,  $\text{CDCl}_3$ ):  $\delta$  198.2, 137.1, 133.1, 128.6( $\times 2$ ), 128.3( $\times 2$ ), 26.6.  
HRMS (ESI $^+$ ): calcd 121.0648 for  $\text{C}_8\text{H}_9\text{O}^+$  [M+H] $^+$ ; Found, 121.0648.

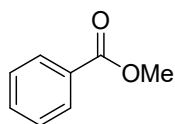

Compound **6**, Obtain as the yellow oil,  $^1\text{H}$  NMR (400 MHz,  $\text{CDCl}_3$ ):  $\delta$  8.06-8.03 (m, 2H), 7.56-7.51 (m, 1H), 7.44-7.40 (m, 2H), 3.40 (s, 3H).

$^{13}\text{C}$  NMR (100 MHz,  $\text{CDCl}_3$ ):  $\delta$  167.0, 132.9, 130.2, 129.5( $\times 2$ ), 128.3( $\times 2$ ), 52.0. HRMS (ESI $^+$ ): calcd 159.0417 for  $\text{C}_8\text{H}_8\text{NaO}_2^+$  [M+Na] $^+$ ; Found, 159.0420.

### 5. X-ray crystal data for compound **2a** (CCDC deposition number: 2160655).

$\text{C}_{13}\text{H}_{11}\text{NO}$ ,  $M = 197.23$ ,  $a = 5.3315(6)$  Å,  $b = 7.7796(8)$  Å,  $c = 12.4238(14)$  Å,  $\alpha = 72.694(6)^\circ$ ,  $\beta = 78.711(5)^\circ$ ,  $\gamma = 89.961(5)^\circ$ ,  $V = 481.54(9)$  Å $^3$ ,  $T = 100.(2)$  K, space group  $P-1$ ,  $Z = 2$ ,  $\mu(\text{Cu K}\alpha) = 0.687$  mm $^{-1}$ , 5689 reflections measured, 1857 independent reflections ( $R_{int} = 0.0652$ ). The final  $R_I$  values were 0.1139 ( $I > 2\sigma(I)$ ). The final  $wR(F^2)$  values were 0.3700 ( $I > 2\sigma(I)$ ). The final  $R_I$  values were 0.1245 (all data). The final  $wR(F^2)$  values were 0.3950 (all data). The goodness of fit on  $F^2$  was 1.833.

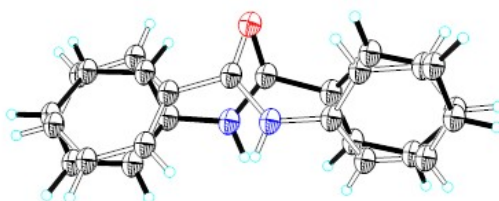

**Figure 1s.** View of the molecules in an asymmetric unit.  
Displacement ellipsoids are drawn at the 30% probability level.

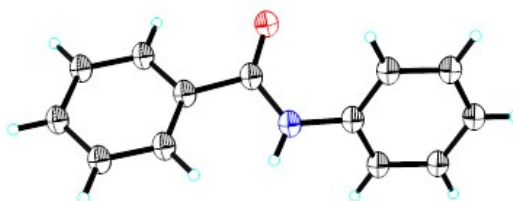

**Figure 2s.** View of a molecule of cp2 with the atom-labelling scheme.  
Displacement ellipsoids are drawn at the 30% probability level.

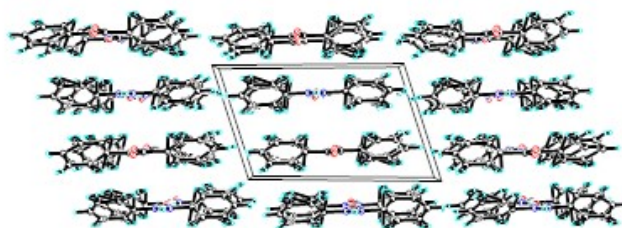

**Figure 3s.** View of the pack drawing of compound **2a**. Hydrogen-bonds are shown as dashed lines.

**Table 1s.** Crystal data and structure refinement for compound **2a**

|                                   |                                             |
|-----------------------------------|---------------------------------------------|
| Identification code               | global                                      |
| Empirical formula                 | C <sub>13</sub> H <sub>11</sub> N O         |
| Formula weight                    | 197.23                                      |
| Temperature                       | 100(2) K                                    |
| Wavelength                        | 1.54178 Å                                   |
| Crystal system                    | Triclinic                                   |
| Space group                       | P-1                                         |
| Unit cell dimensions              | a = 5.3315(6) Å    α = 72.694(6)°.          |
|                                   | b = 7.7796(8) Å    β = 78.711(5)°.          |
|                                   | c = 12.4238(14) Å    γ = 89.961(5)°.        |
| Volume                            | 481.54(9) Å <sup>3</sup>                    |
| Z                                 | 2                                           |
| Density (calculated)              | 1.360 Mg/m <sup>3</sup>                     |
| Absorption coefficient            | 0.687 mm <sup>-1</sup>                      |
| F(000)                            | 208                                         |
| Crystal size                      | 0.700 x 0.400 x 0.150 mm <sup>3</sup>       |
| Theta range for data collection   | 3.81 to 74.94°.                             |
| Index ranges                      | -6 ≤ h ≤ 6, -7 ≤ k ≤ 9, -15 ≤ l ≤ 15        |
| Reflections collected             | 5689                                        |
| Independent reflections           | 1857 [R(int) = 0.0652]                      |
| Completeness to theta = 74.94°    | 93.5 %                                      |
| Absorption correction             | Semi-empirical from equivalents             |
| Max. and min. transmission        | 0.90 and 0.52                               |
| Refinement method                 | Full-matrix least-squares on F <sup>2</sup> |
| Data / restraints / parameters    | 1857 / 716 / 272                            |
| Goodness-of-fit on F <sup>2</sup> | 1.833                                       |
| Final R indices [I > 2σ(I)]       | R1 = 0.1139, wR2 = 0.3700                   |
| R indices (all data)              | R1 = 0.1245, wR2 = 0.3950                   |
| Largest diff. peak and hole       | 0.436 and -0.381 e.Å <sup>-3</sup>          |

## 6. NMR Spectra data of compounds 2

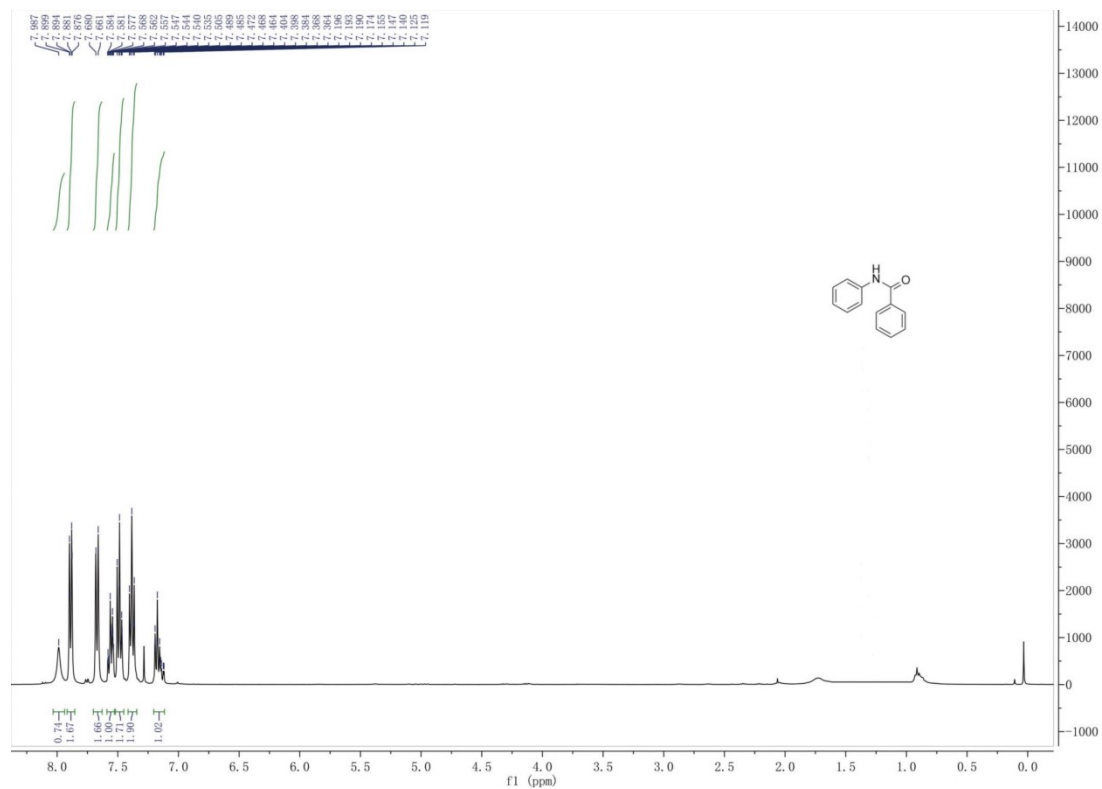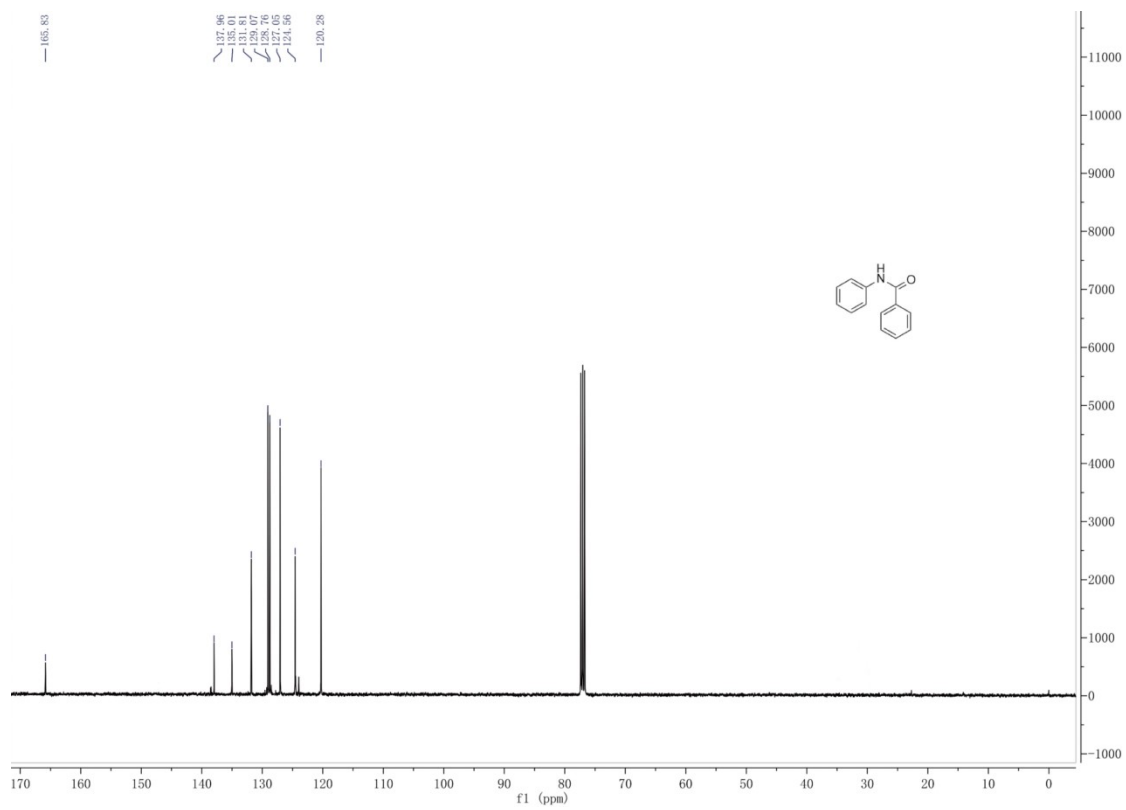

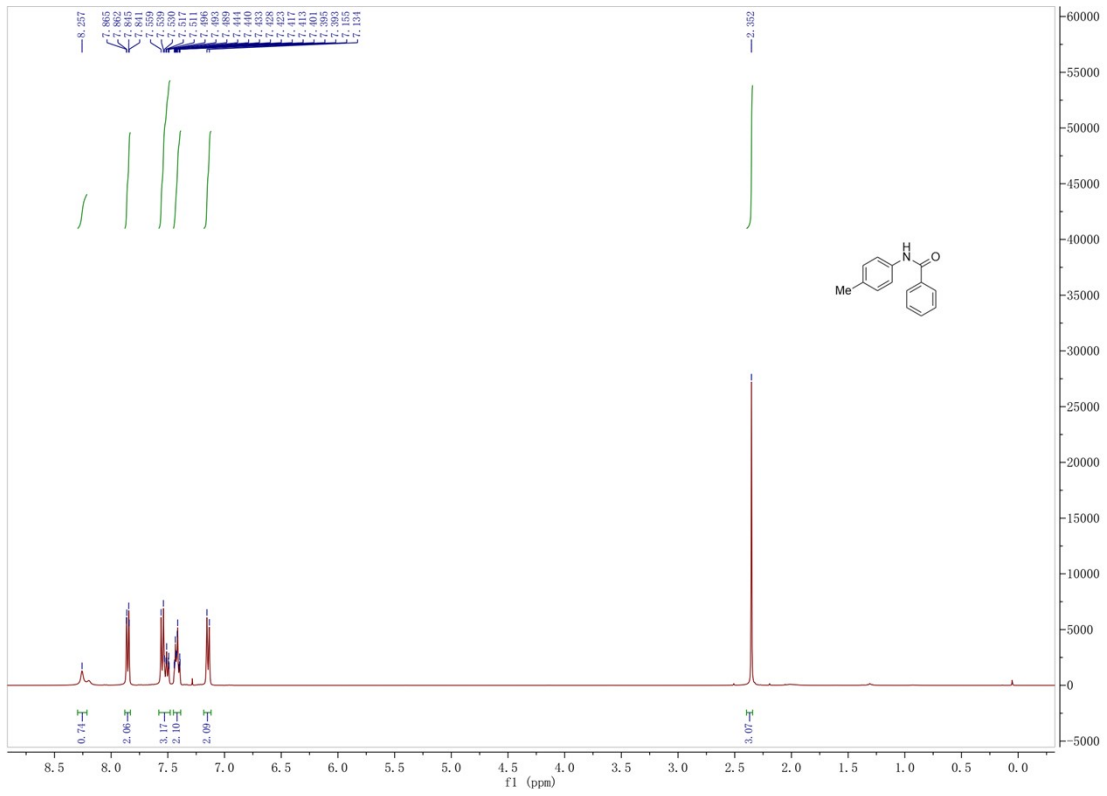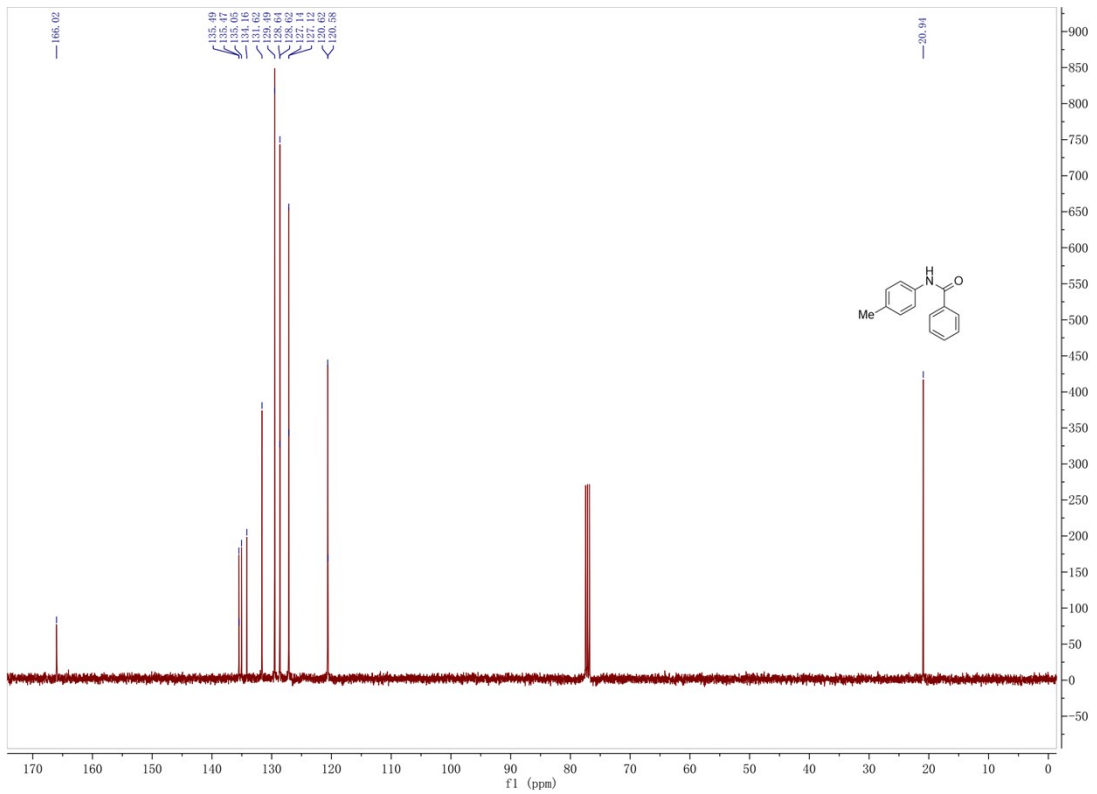

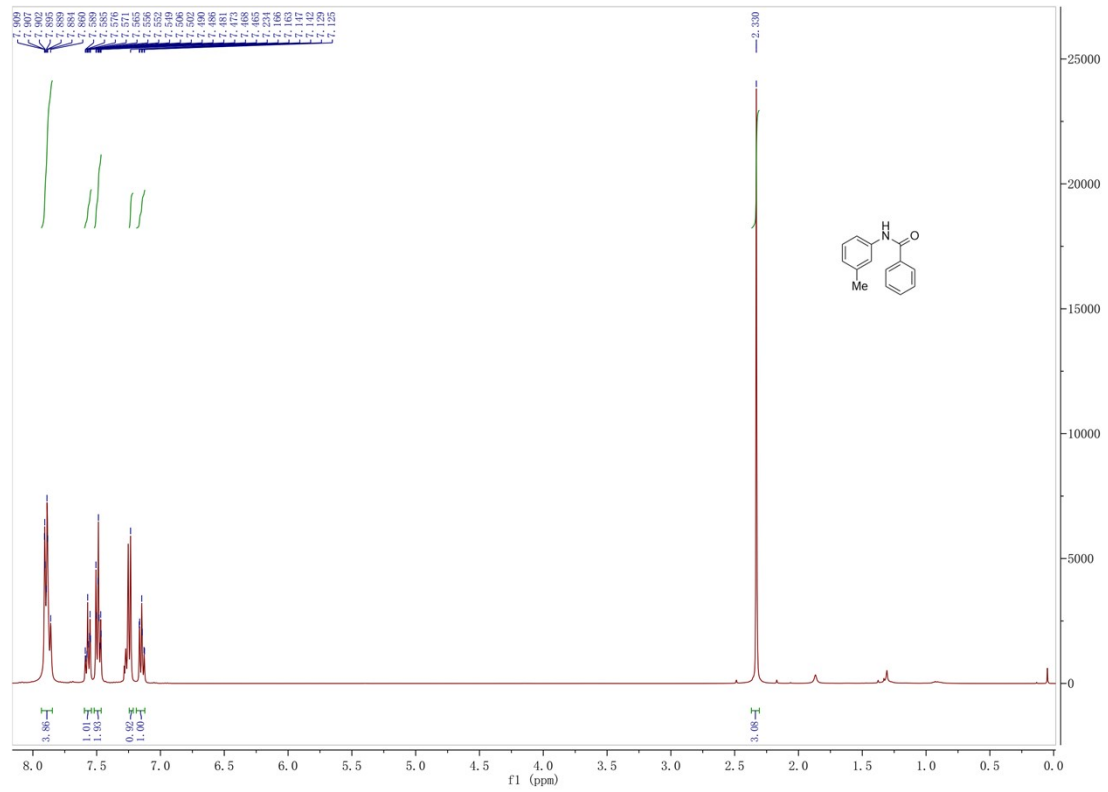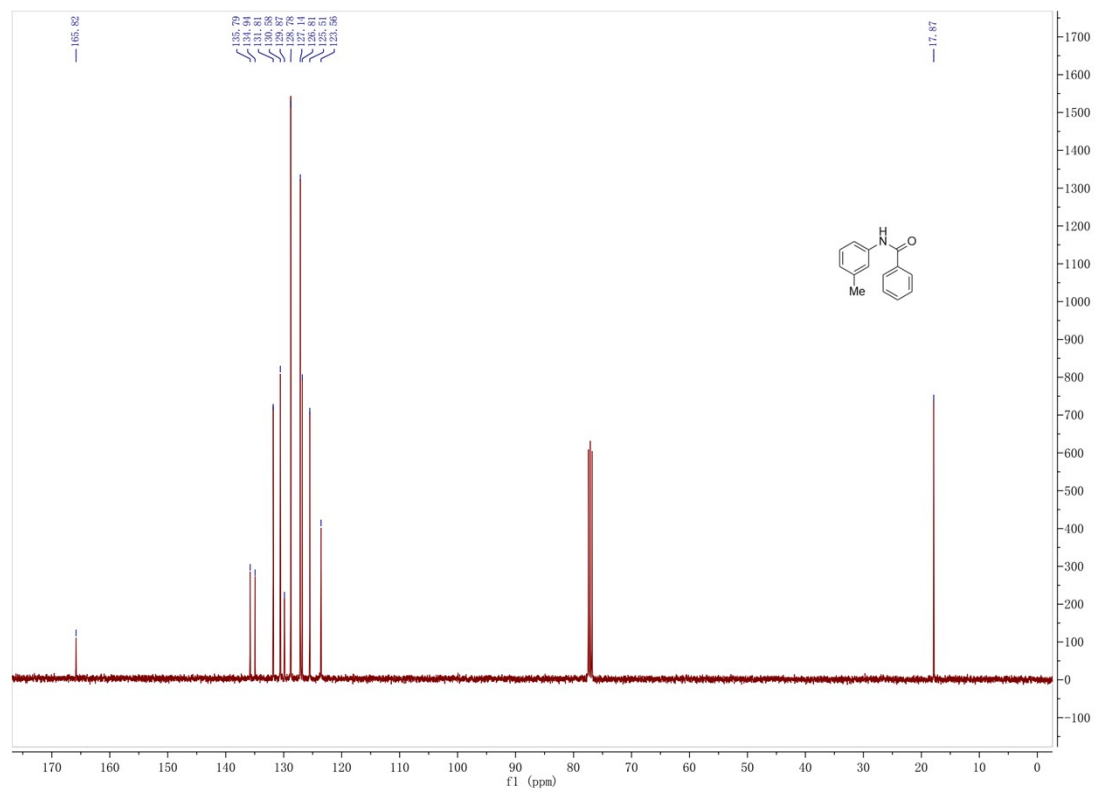

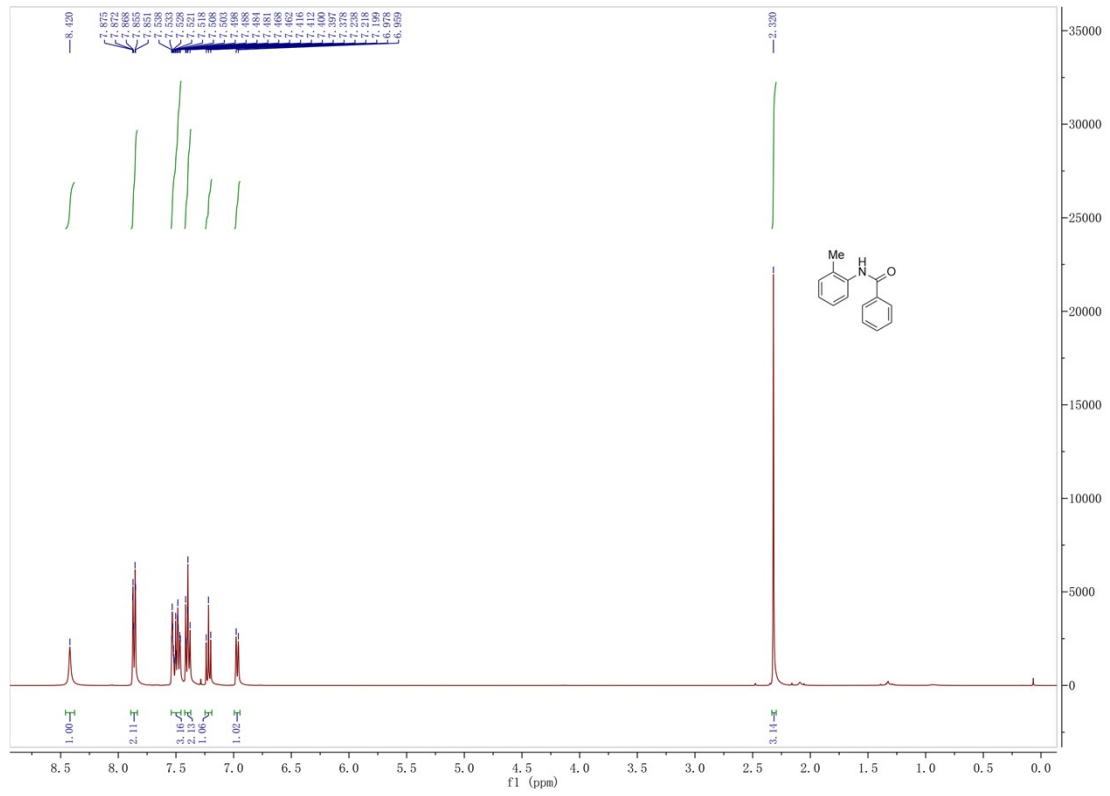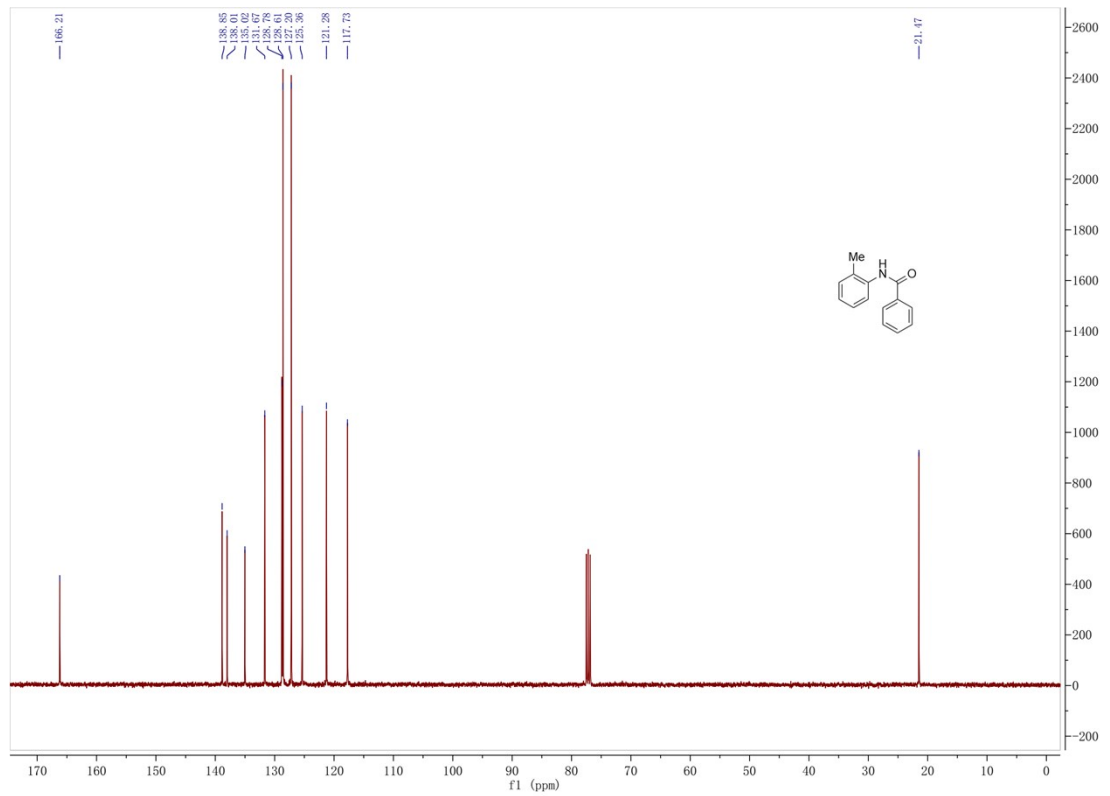

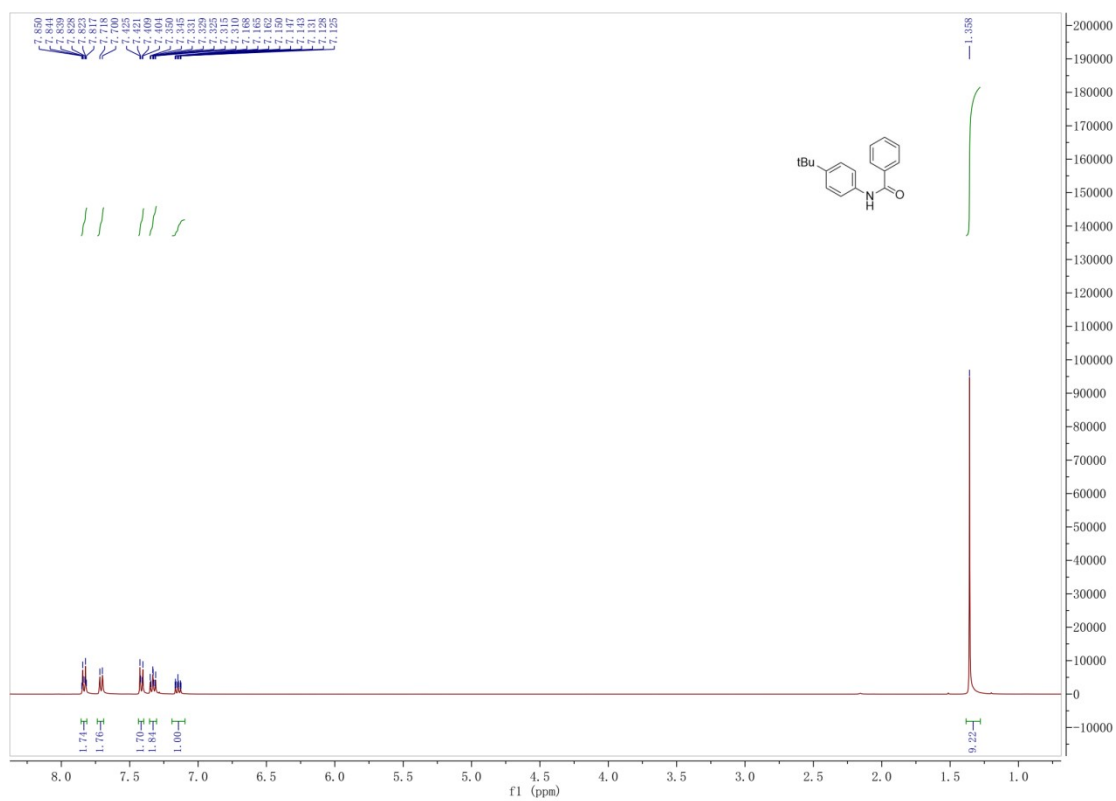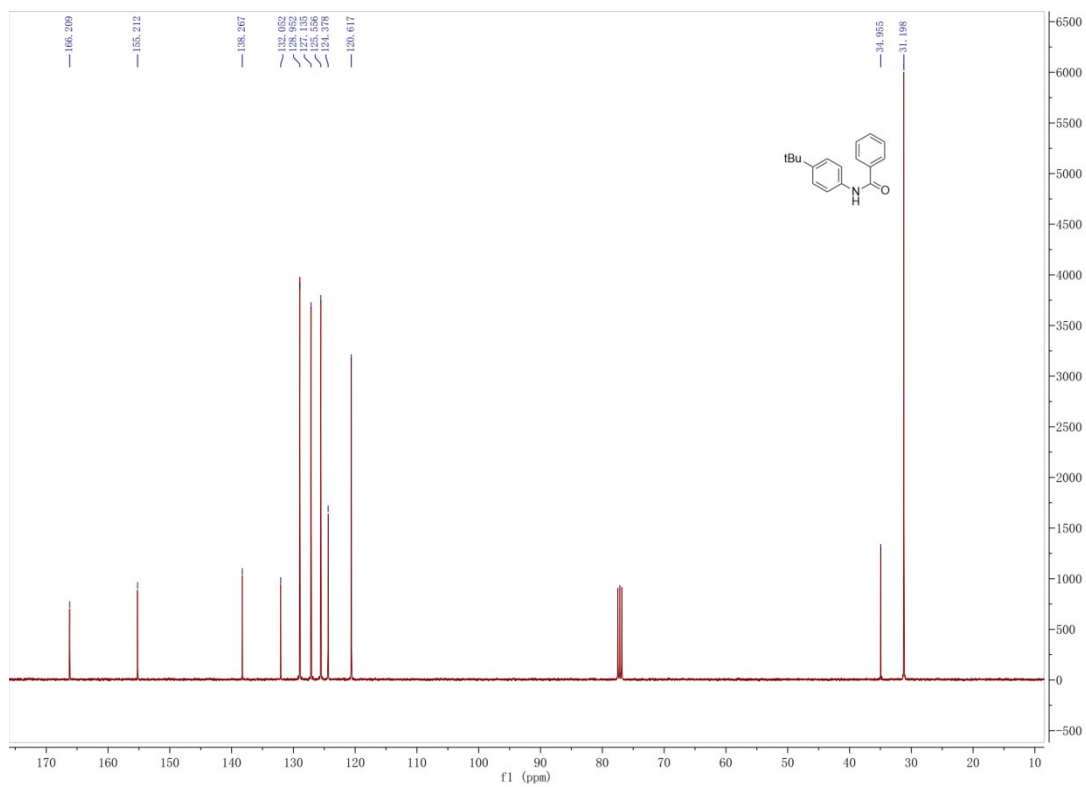



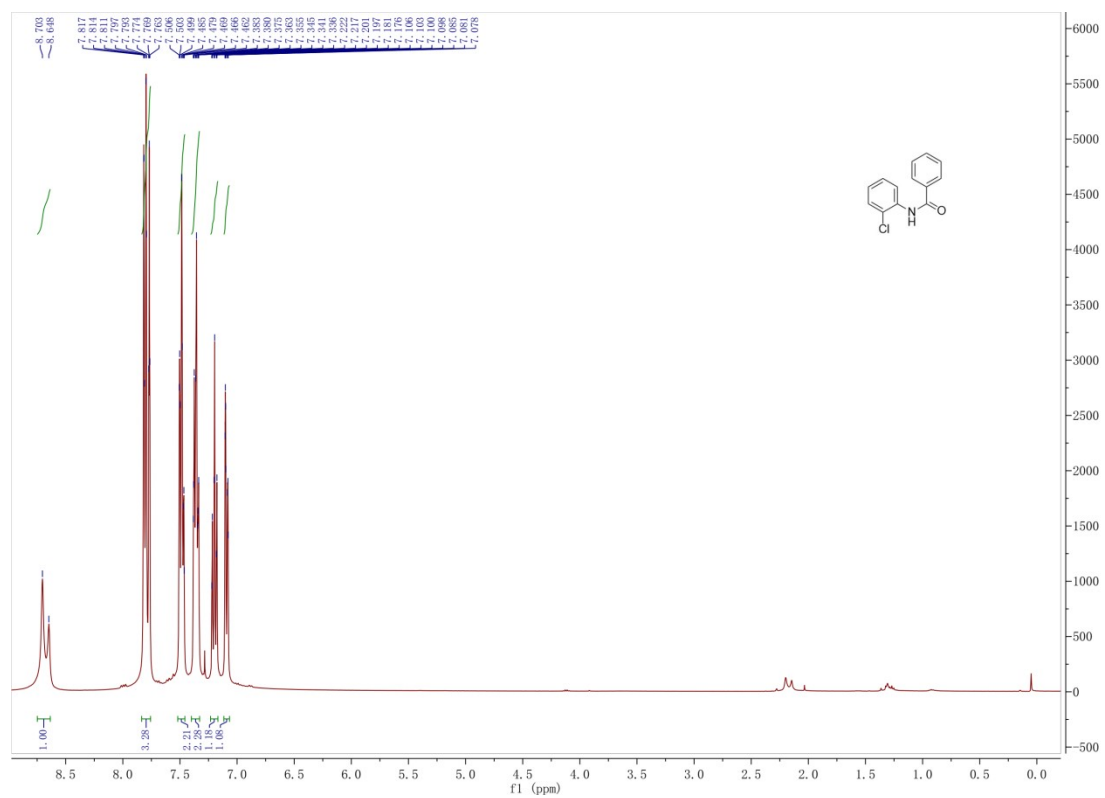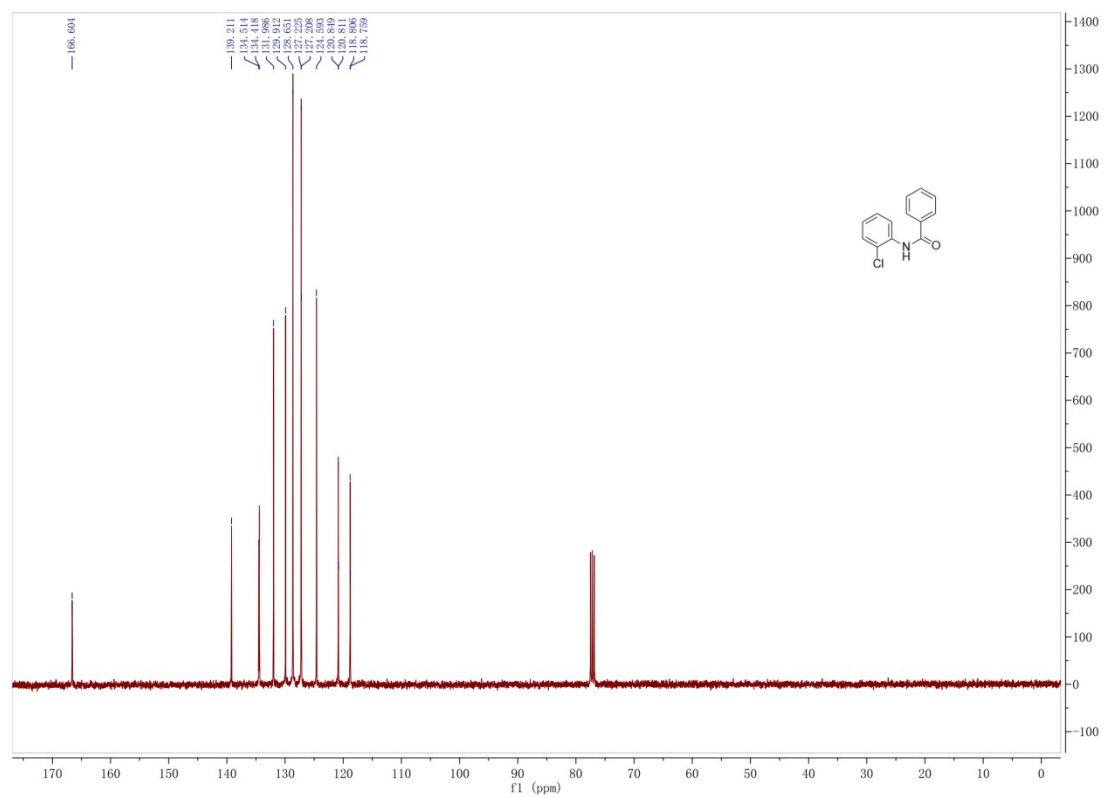

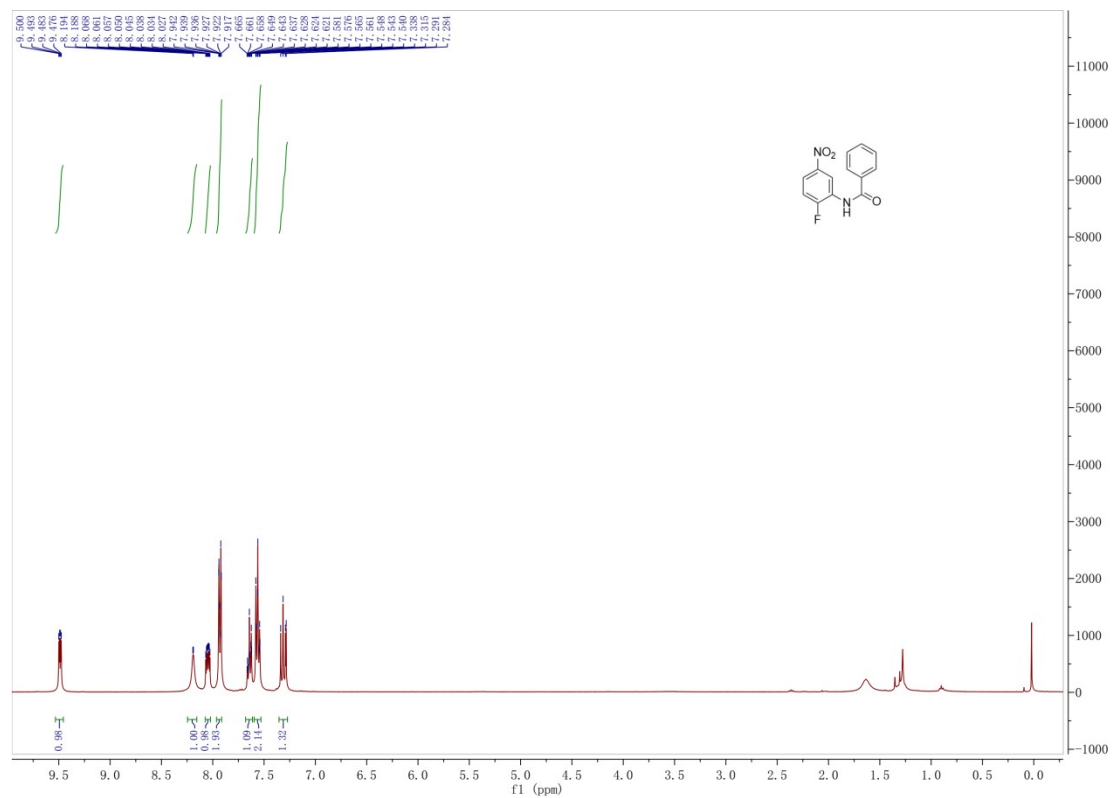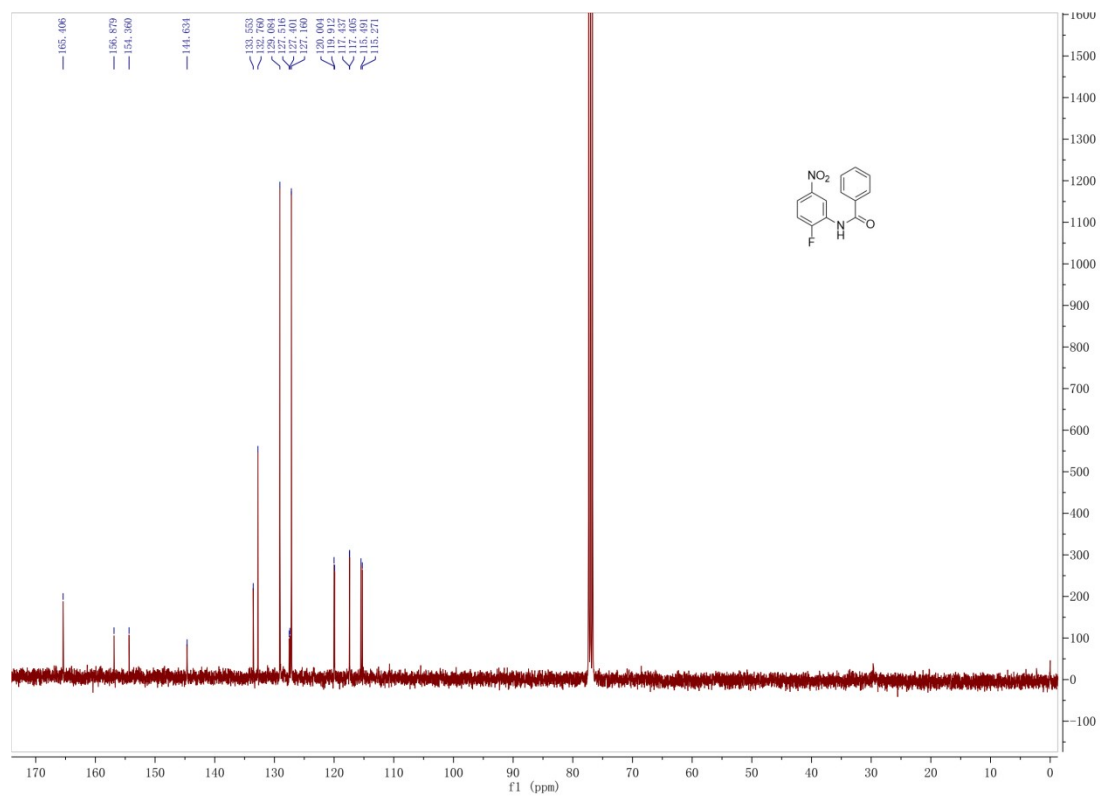

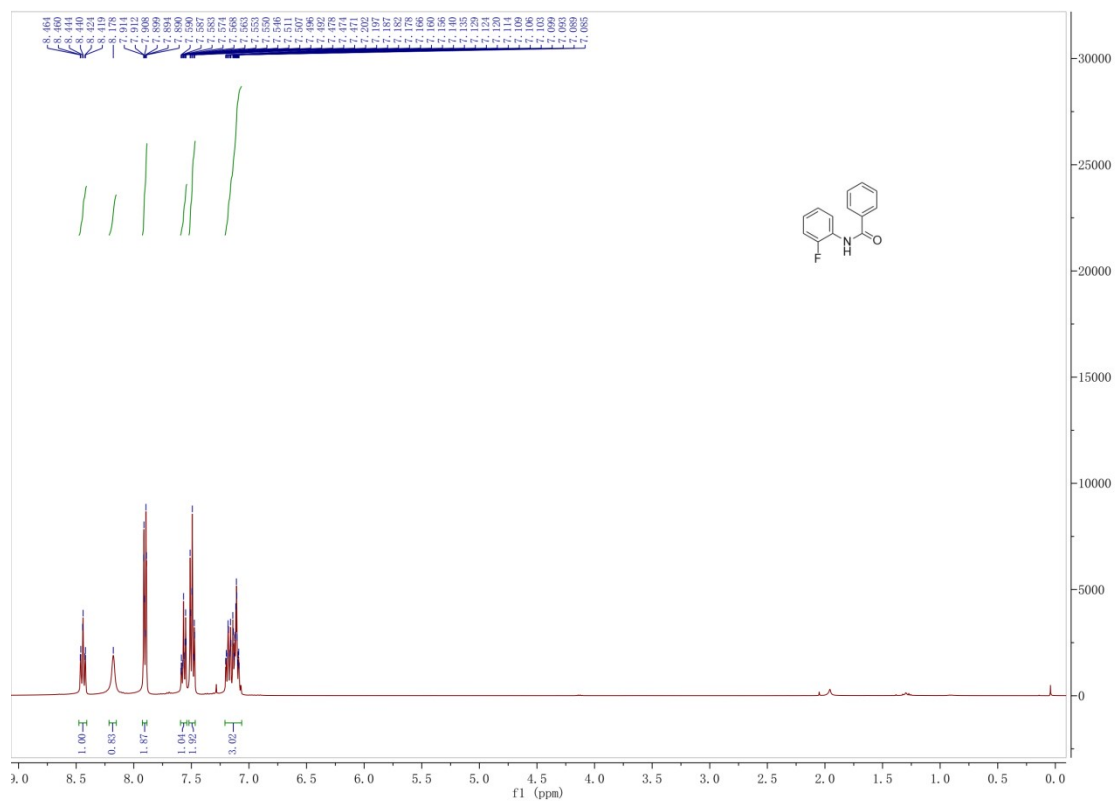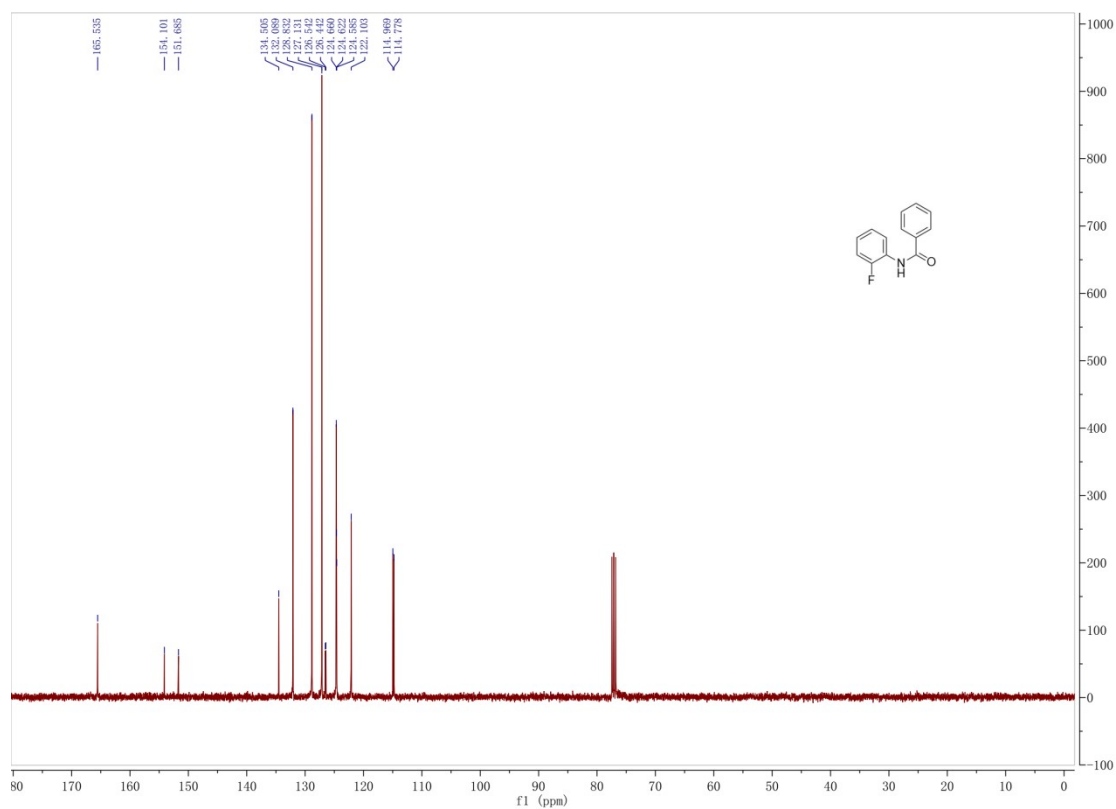

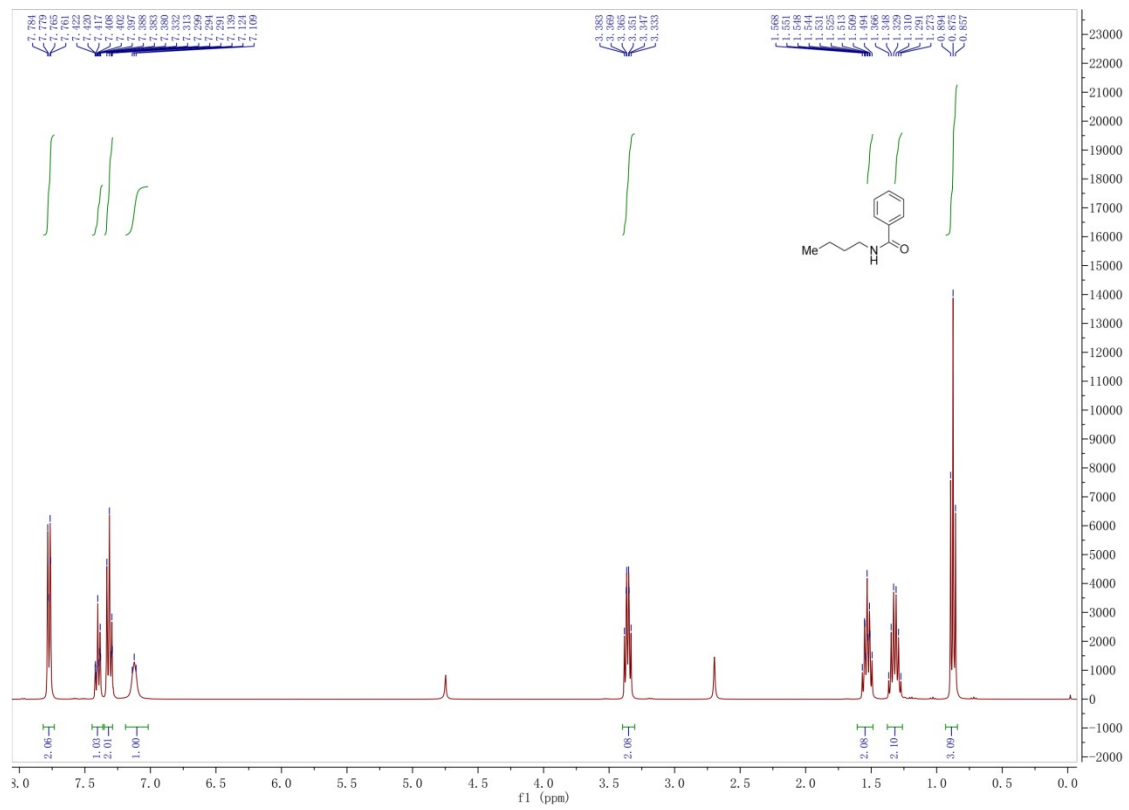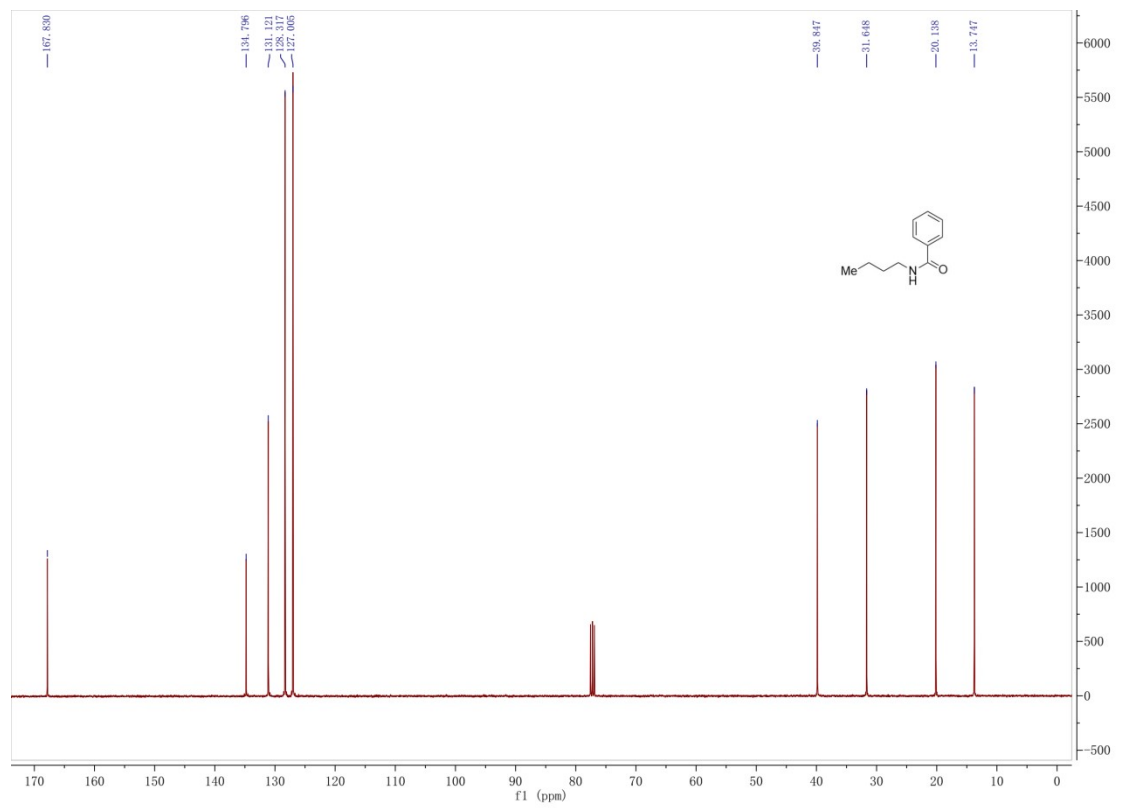

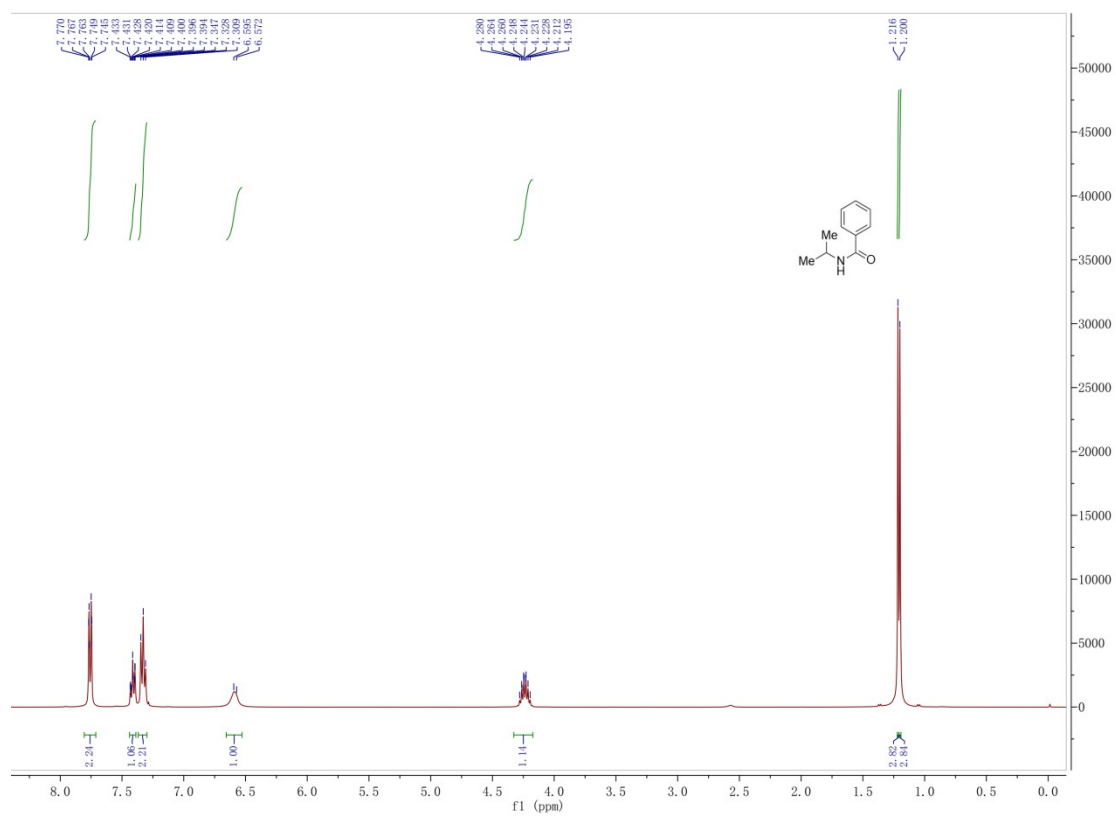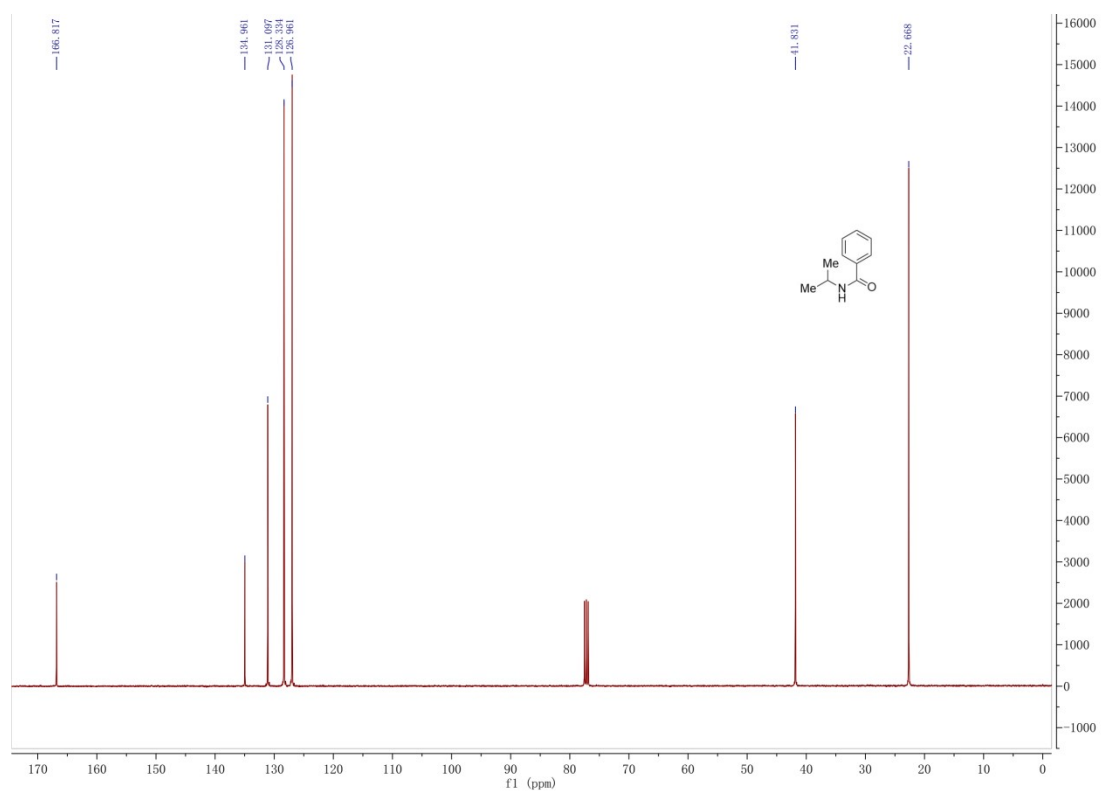

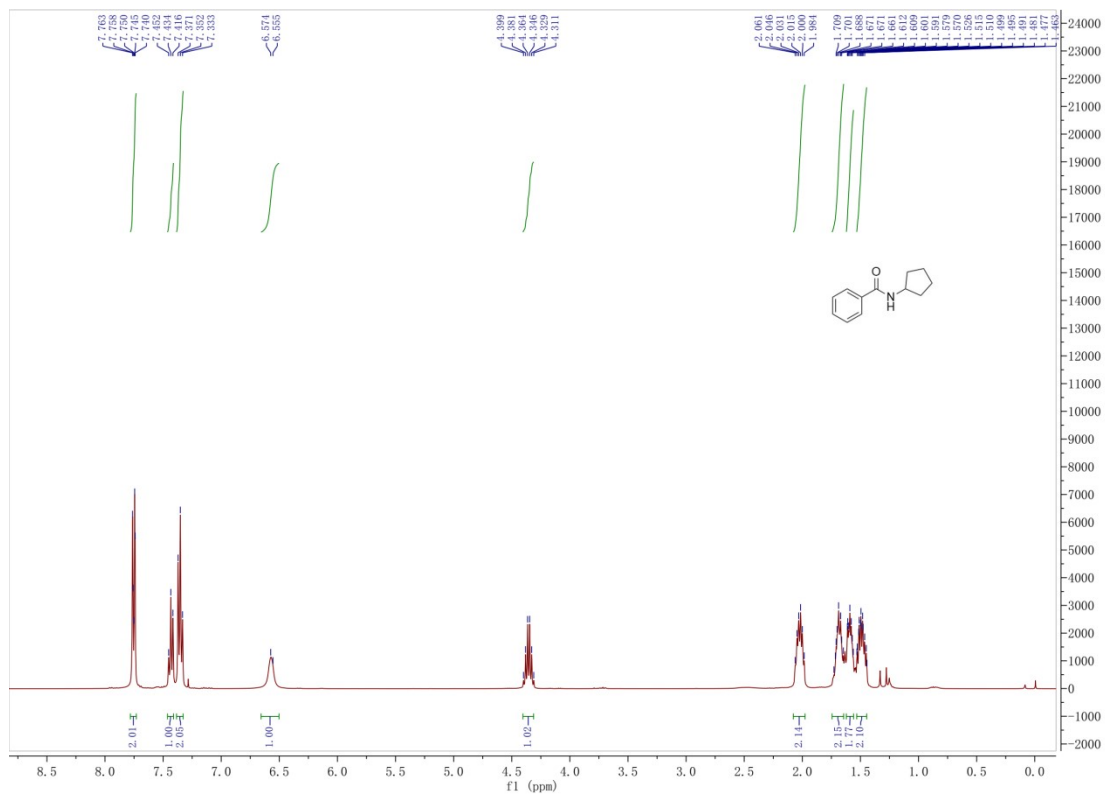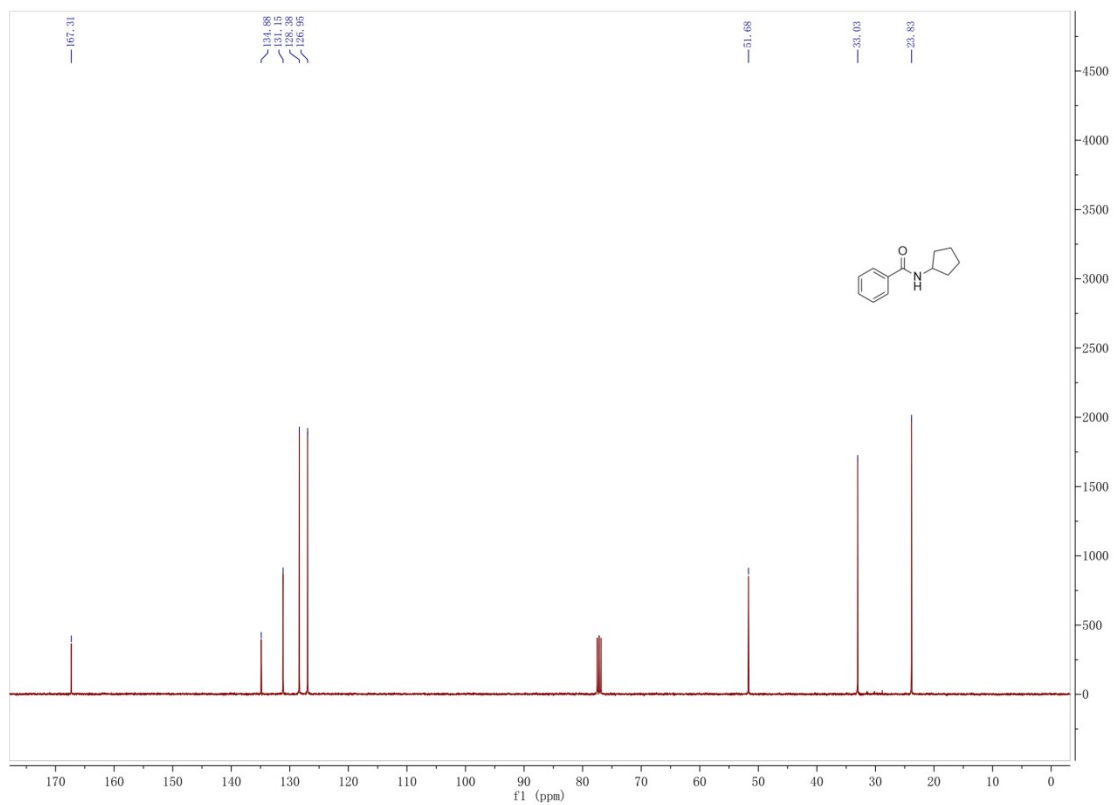

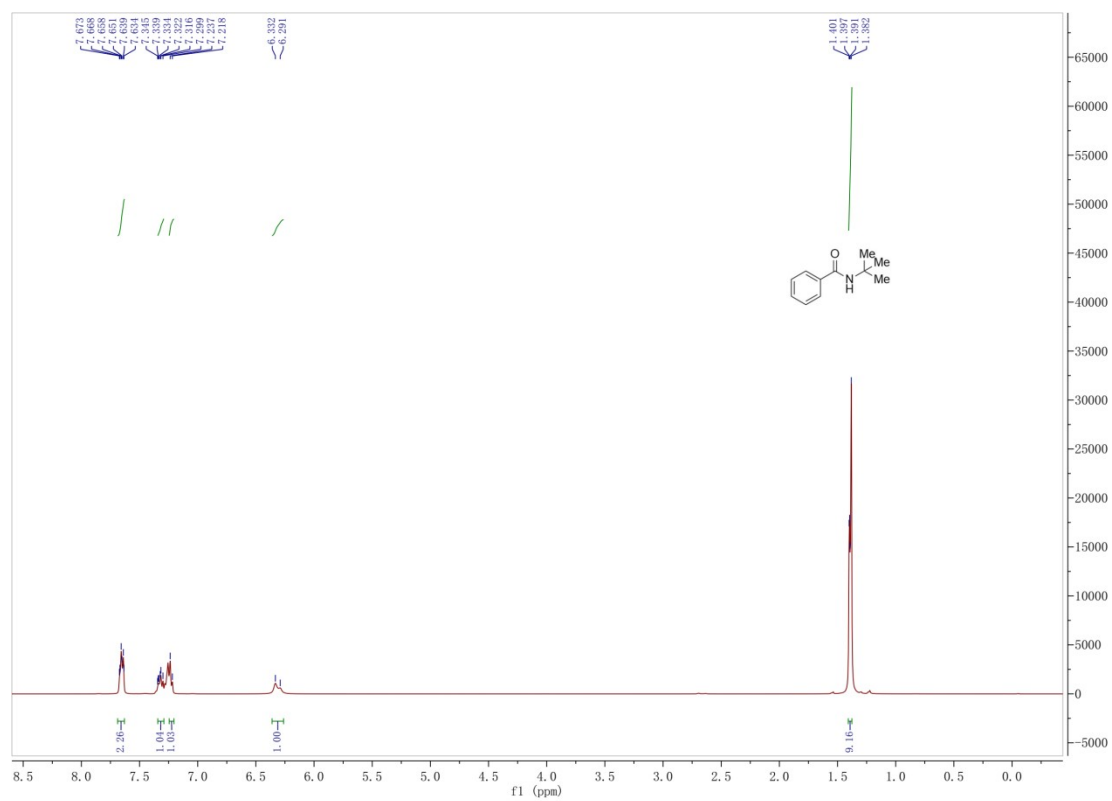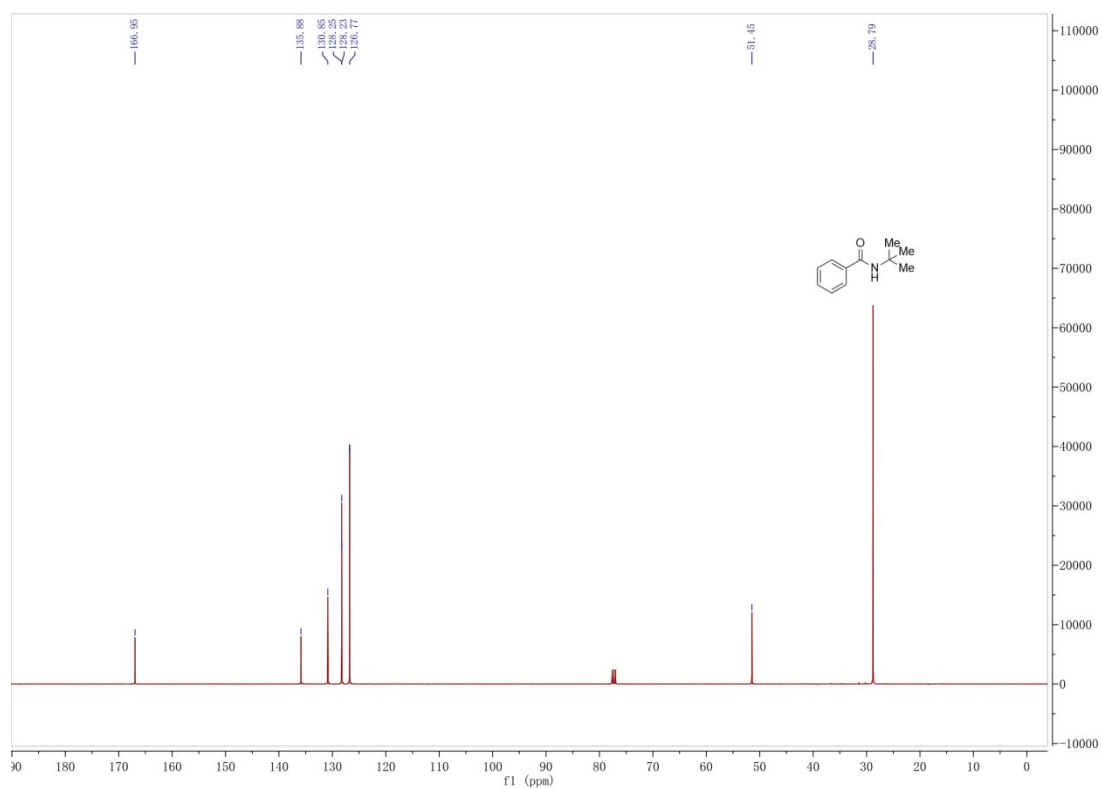

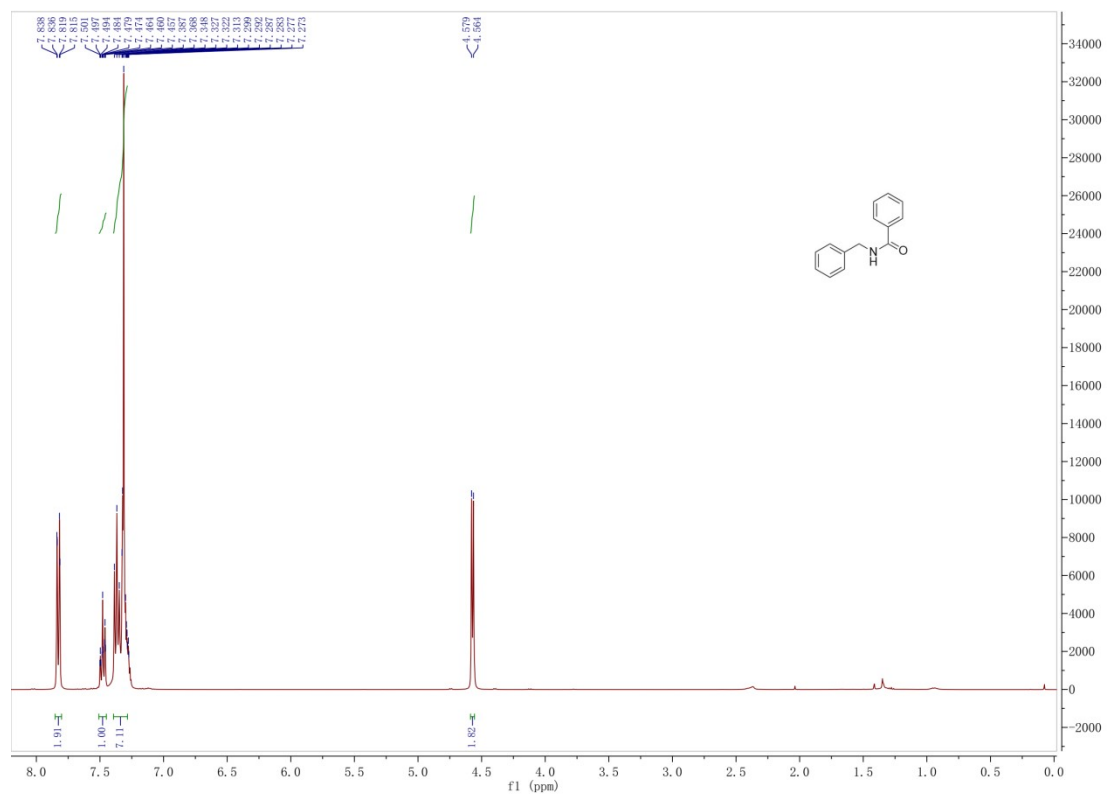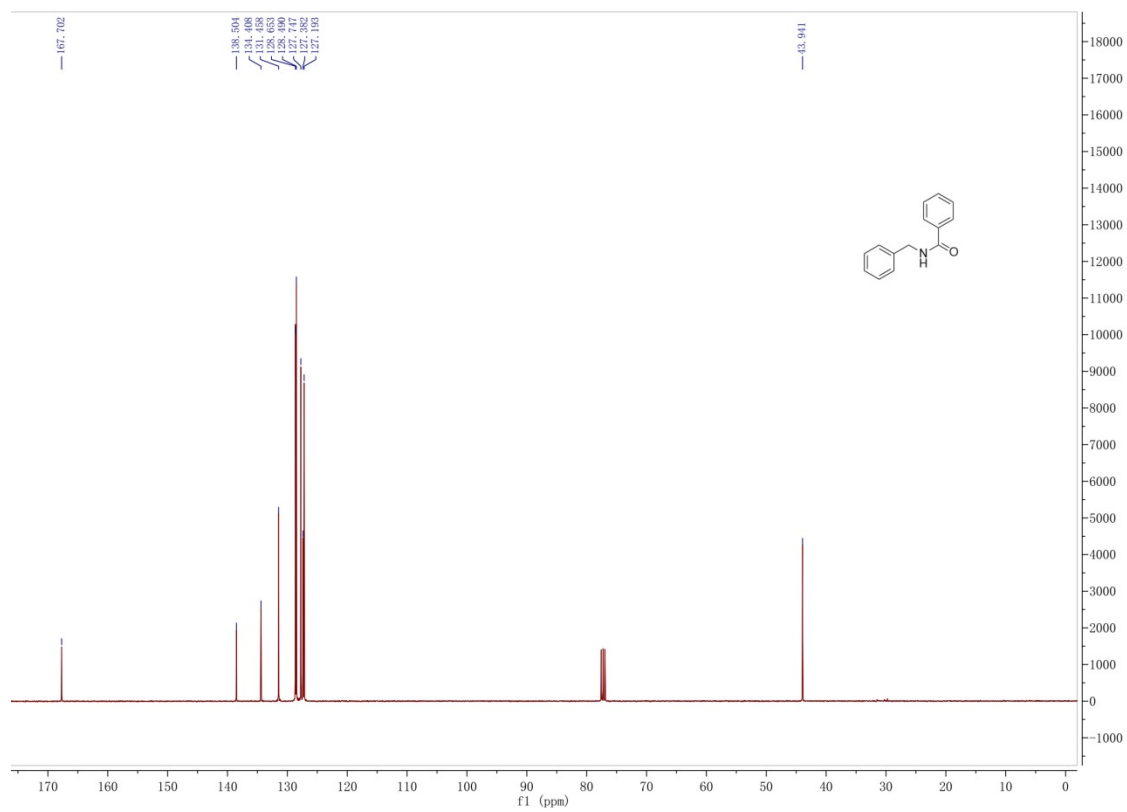



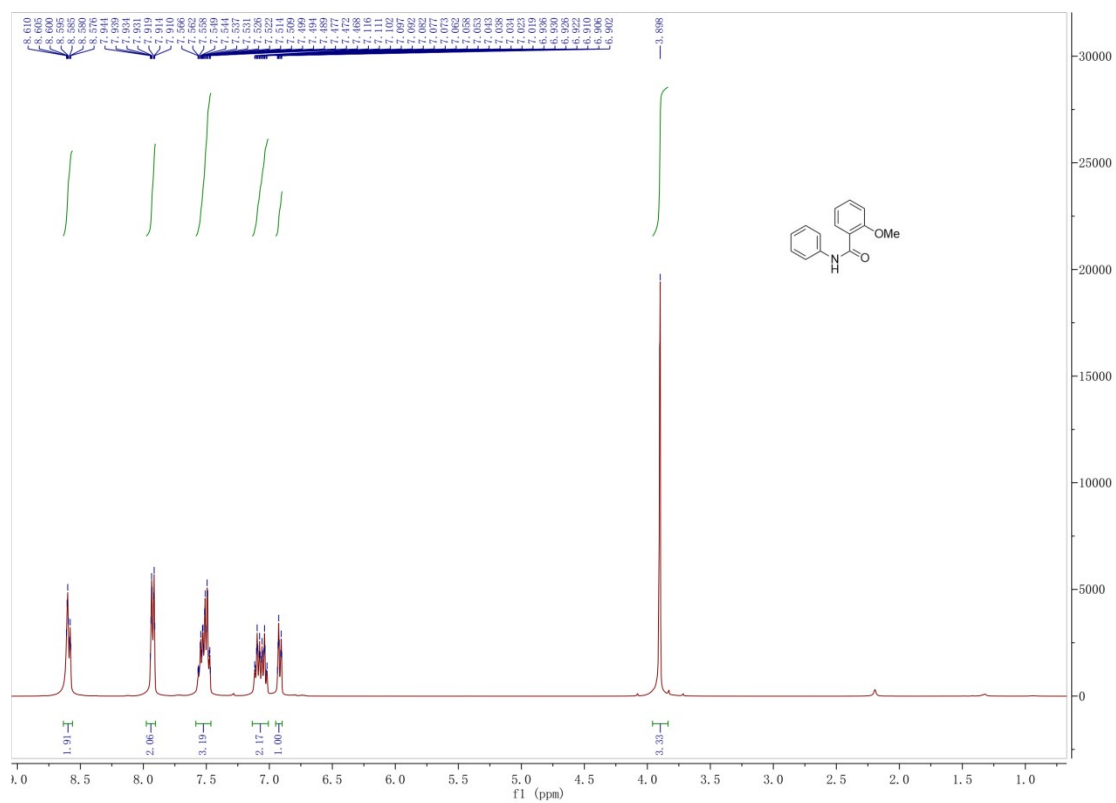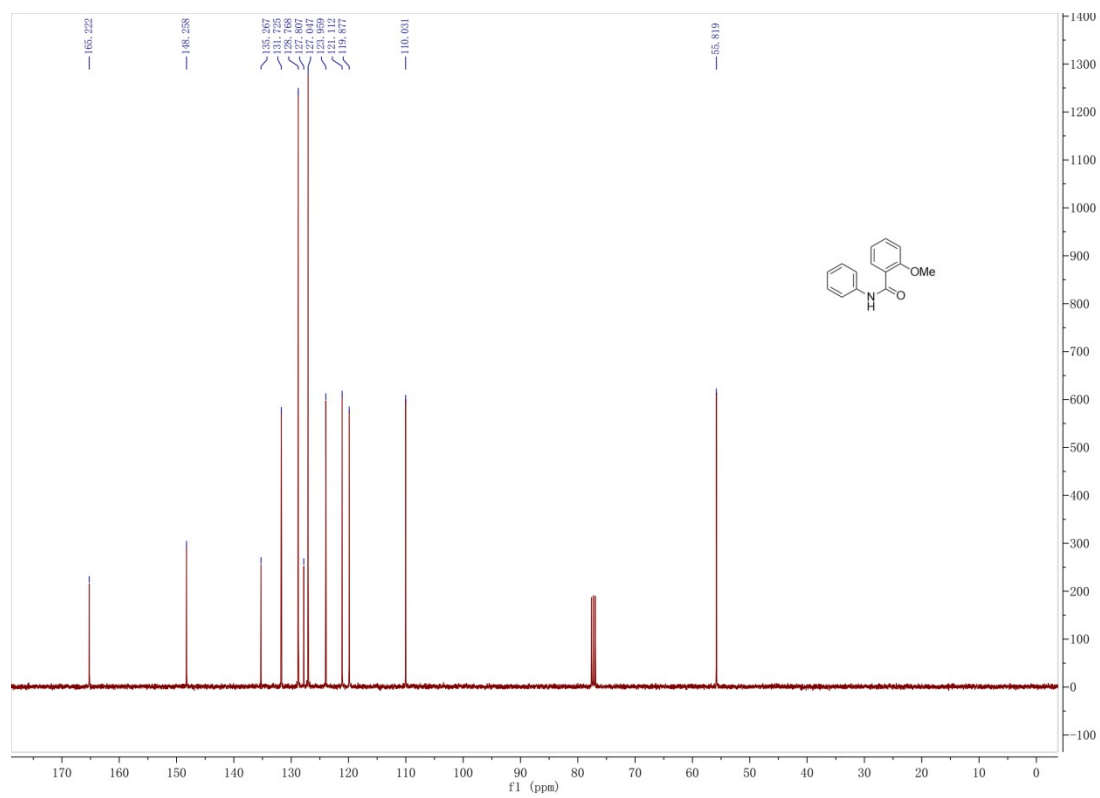

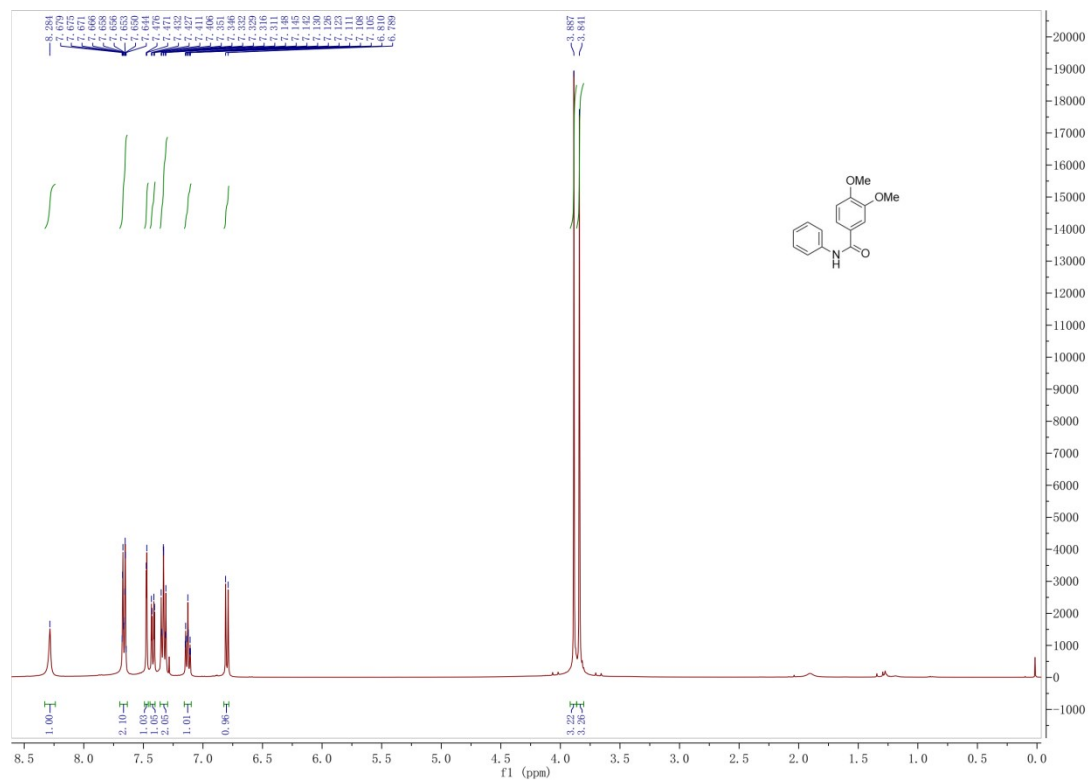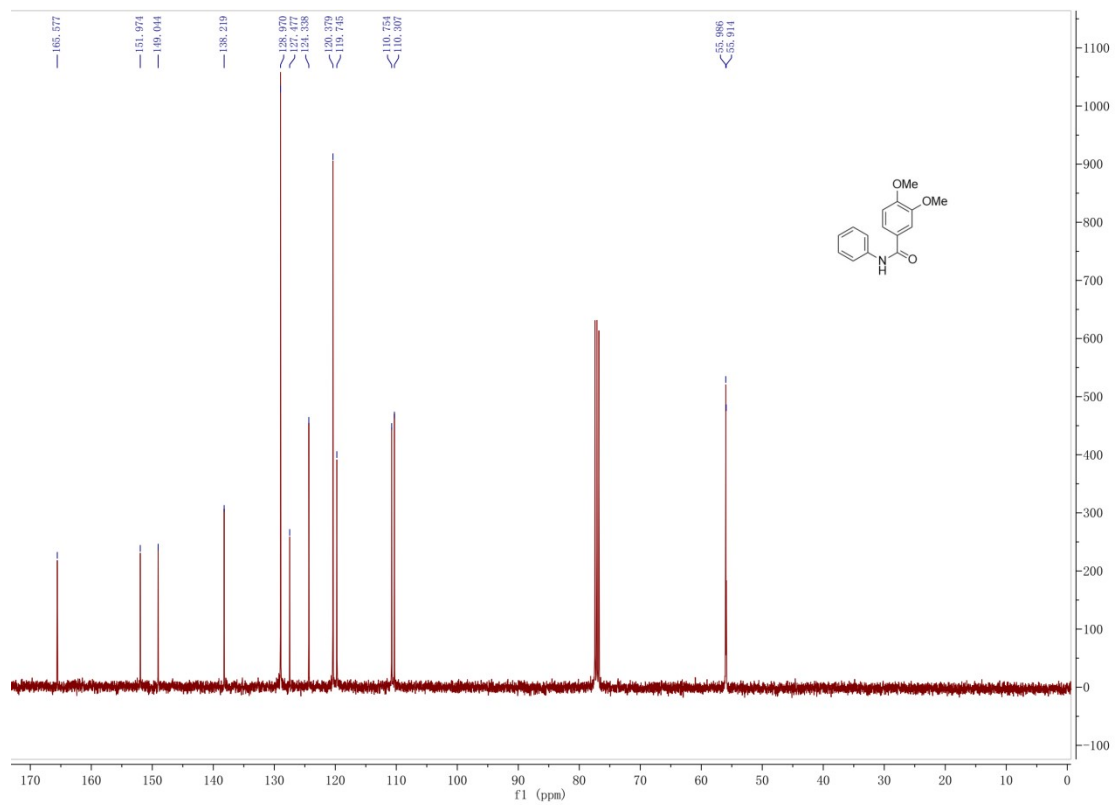

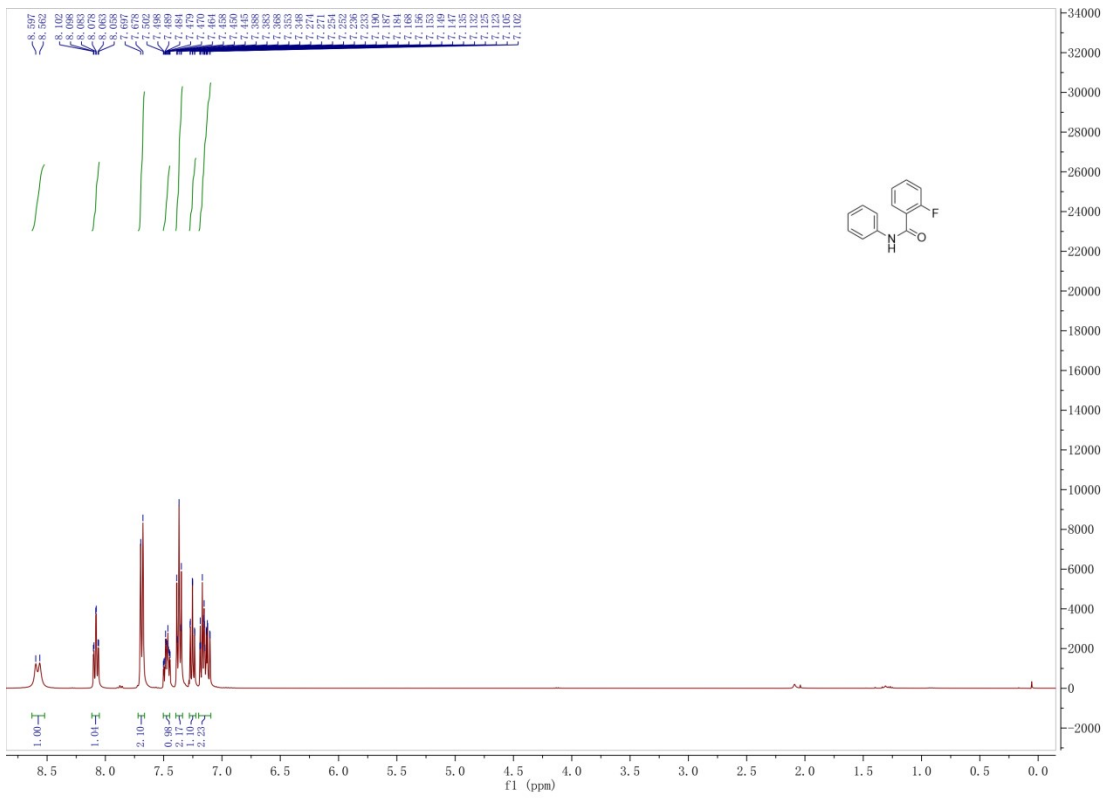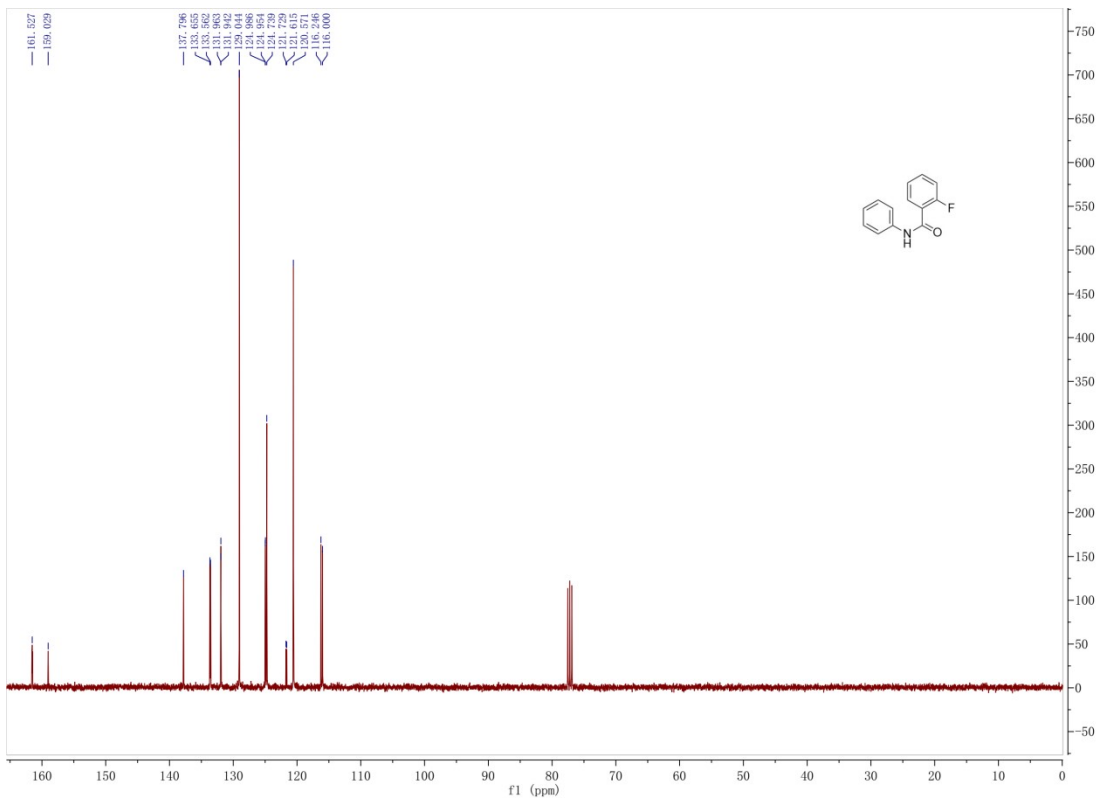

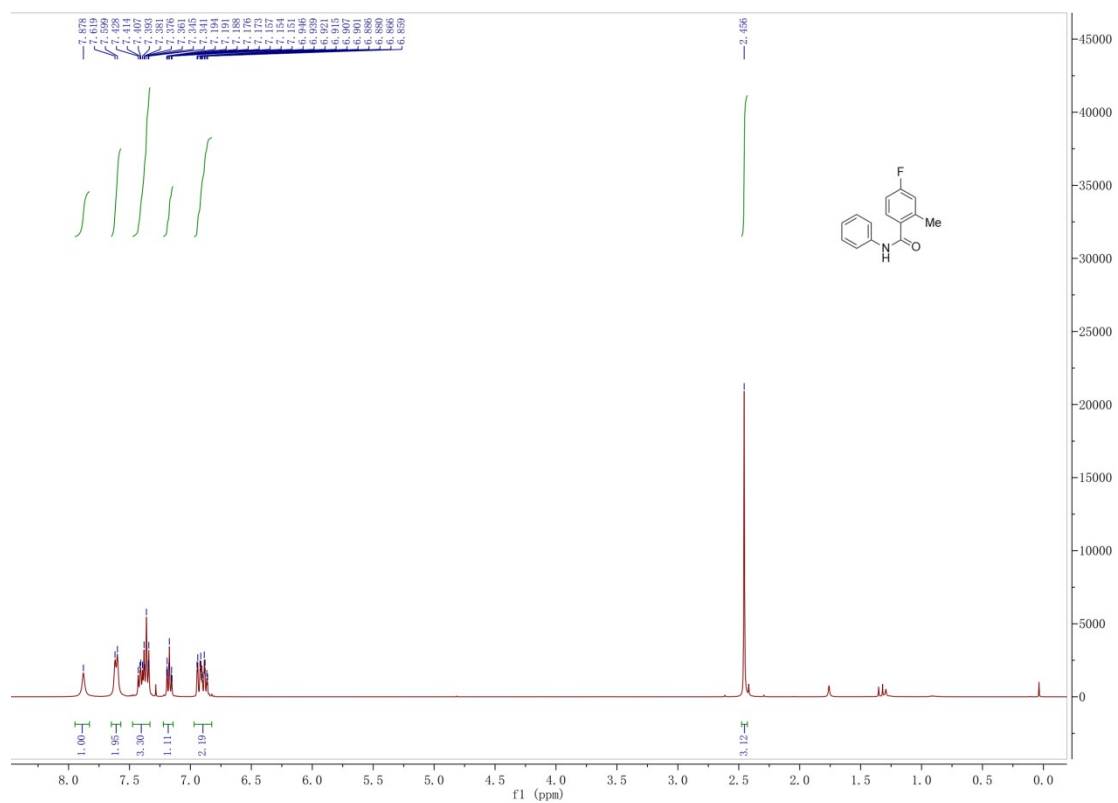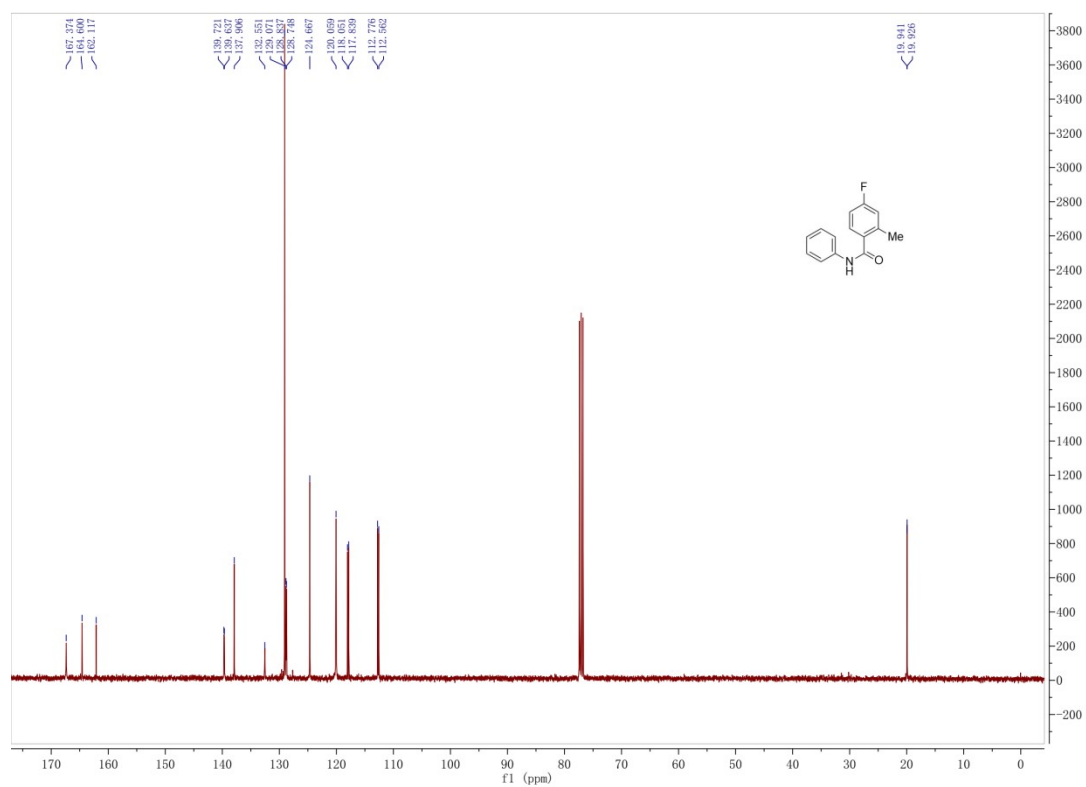

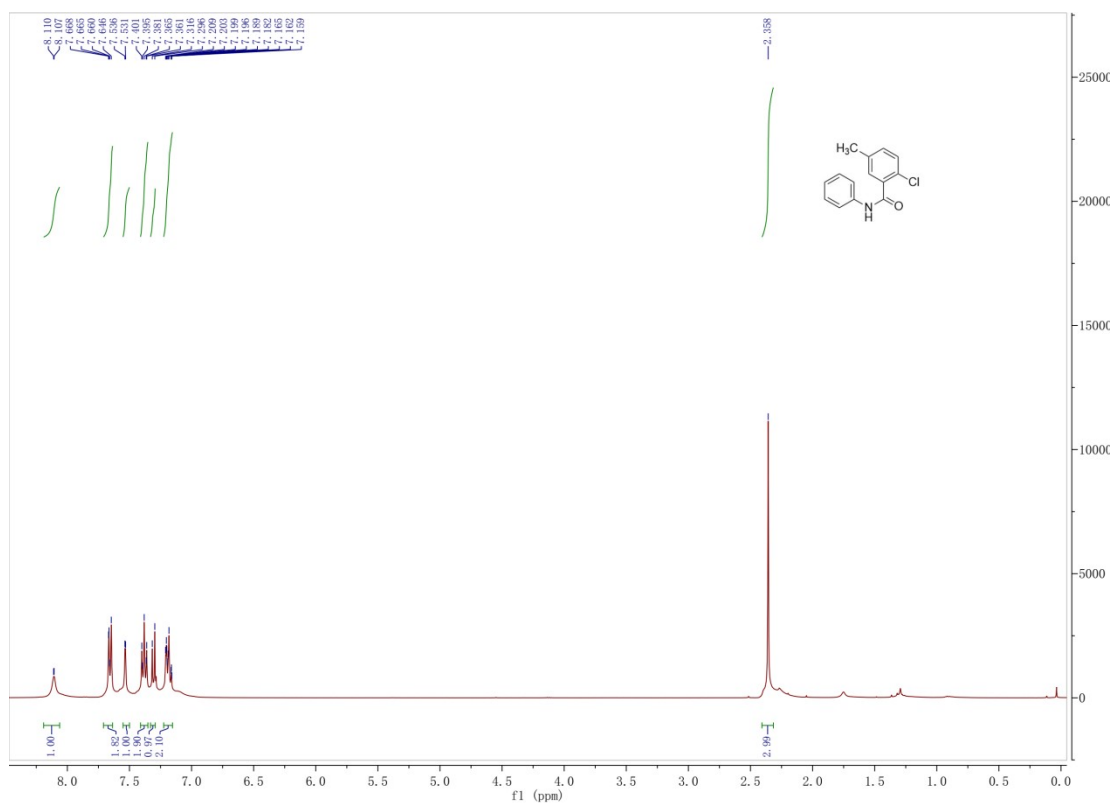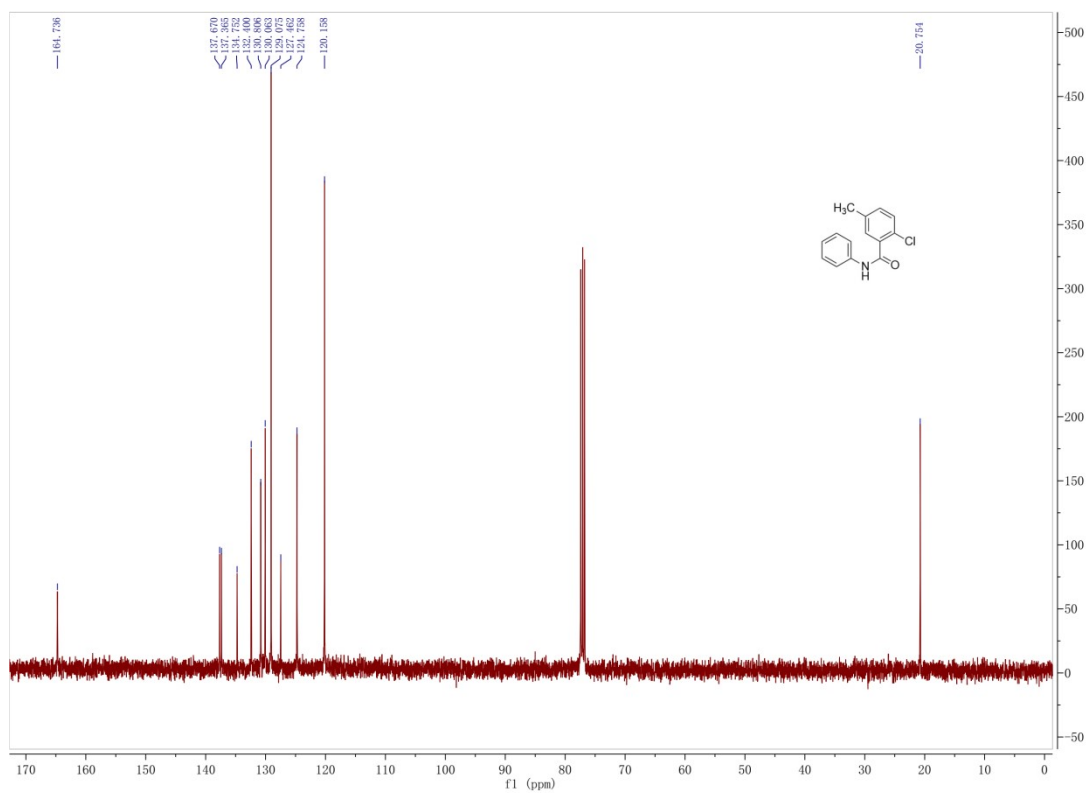

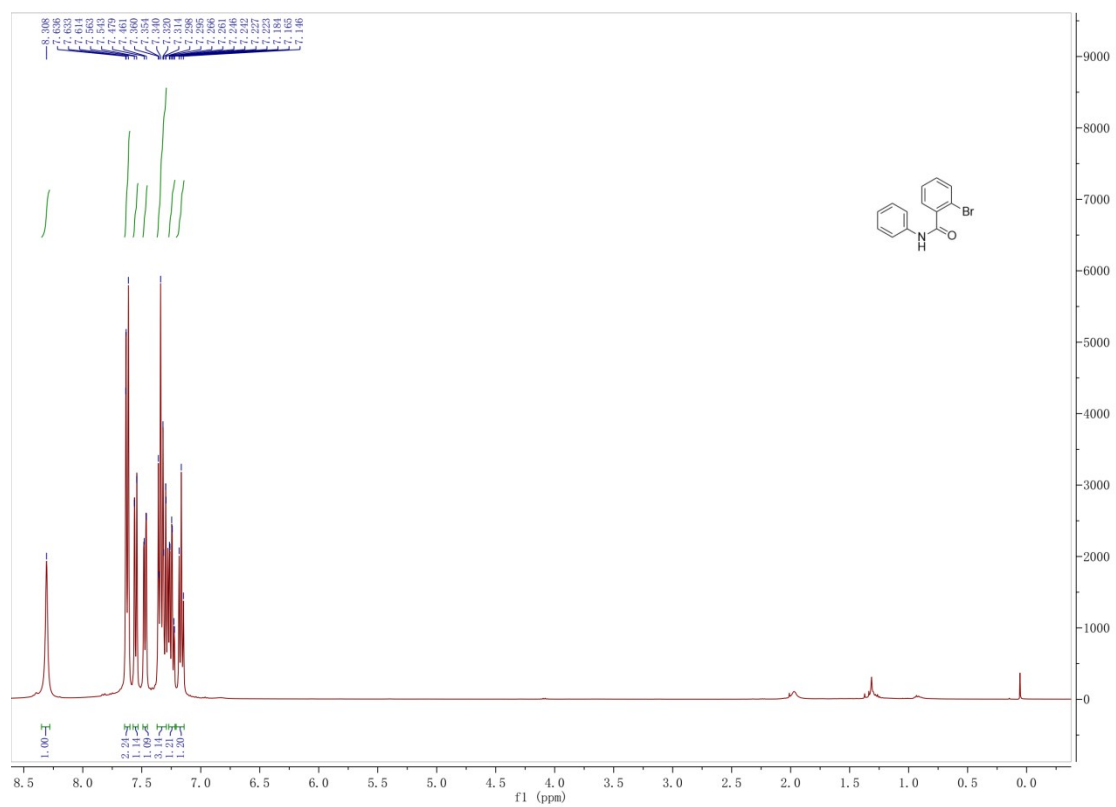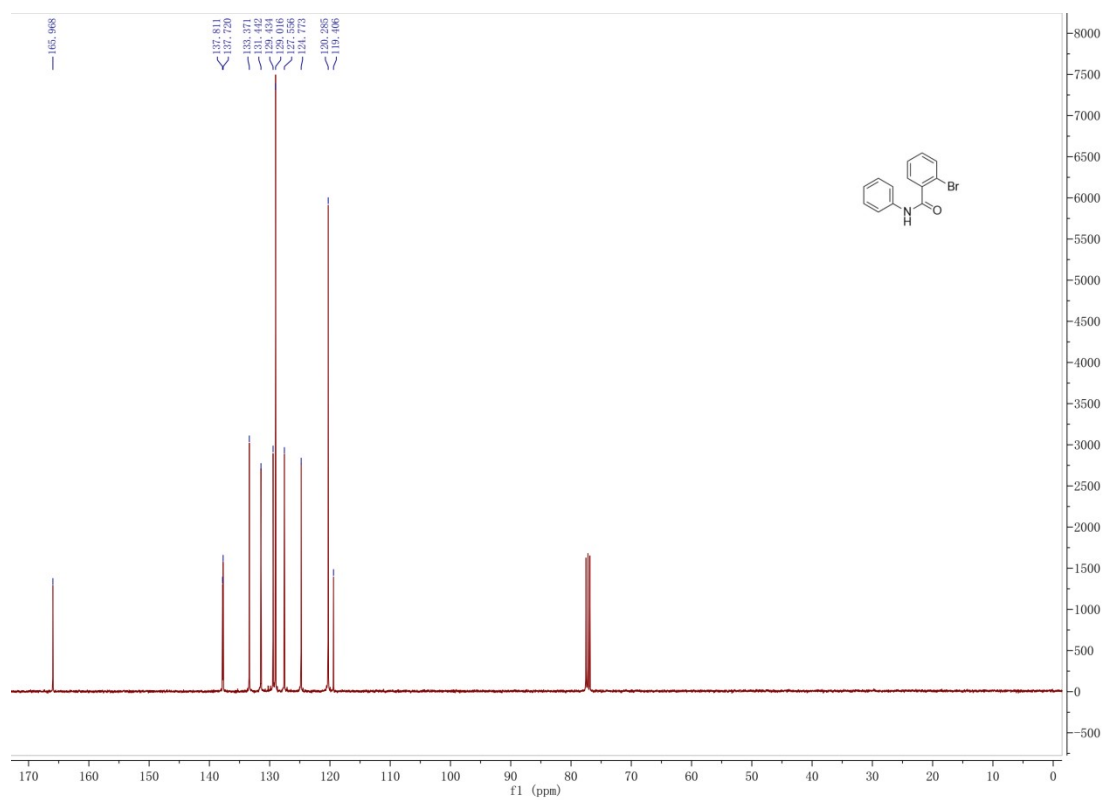

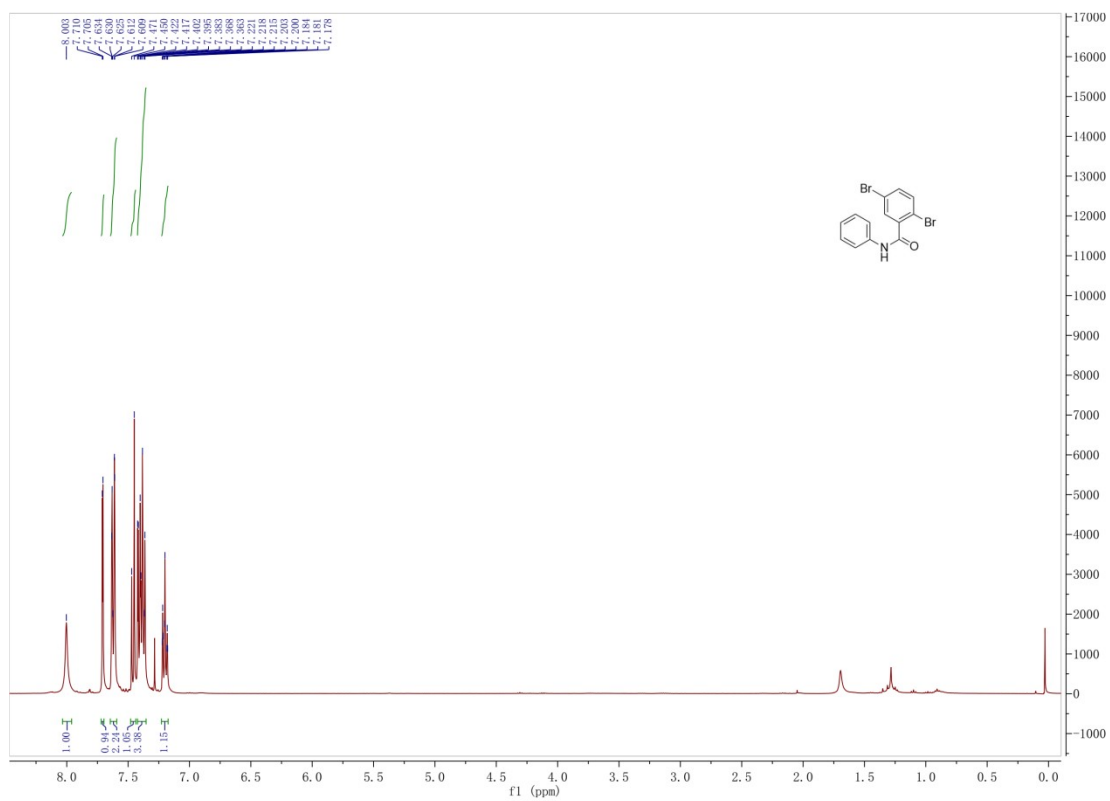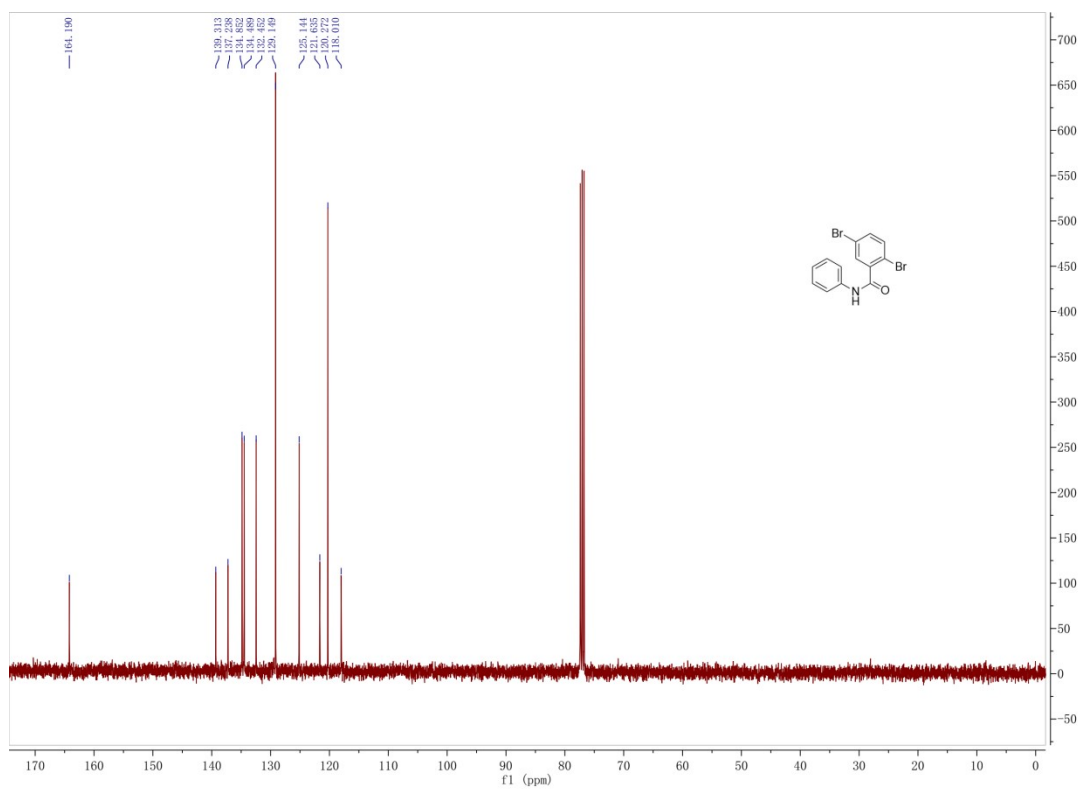

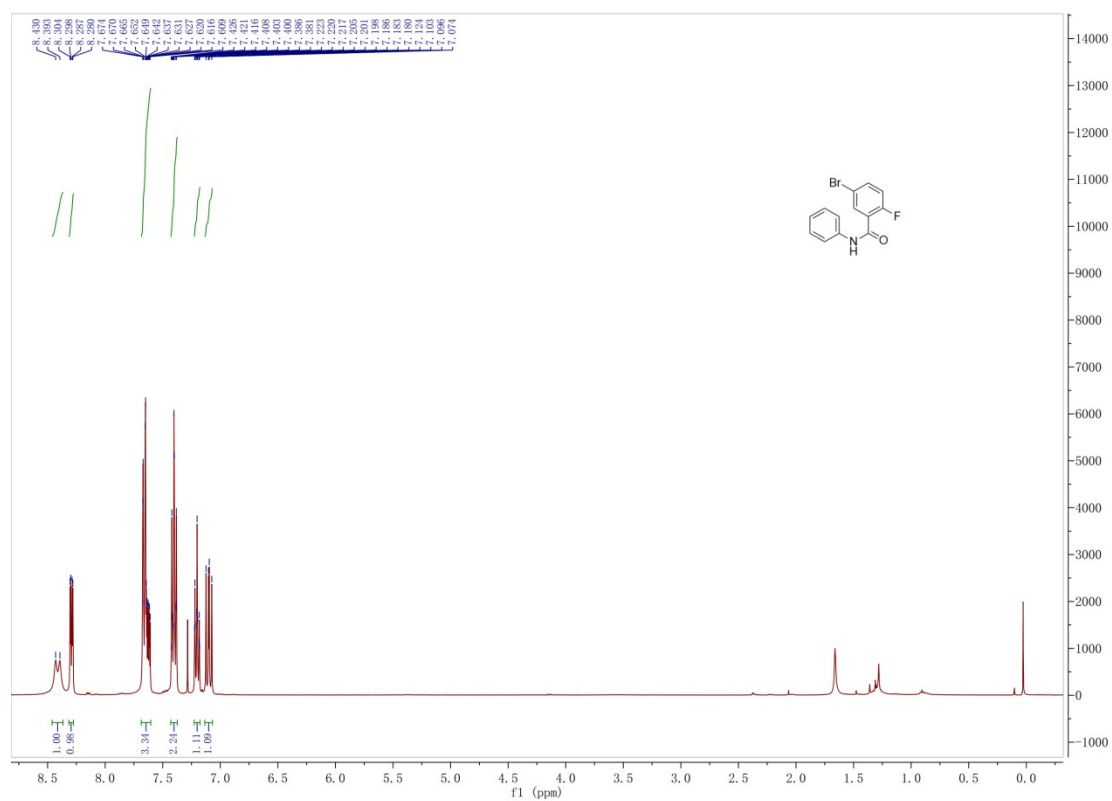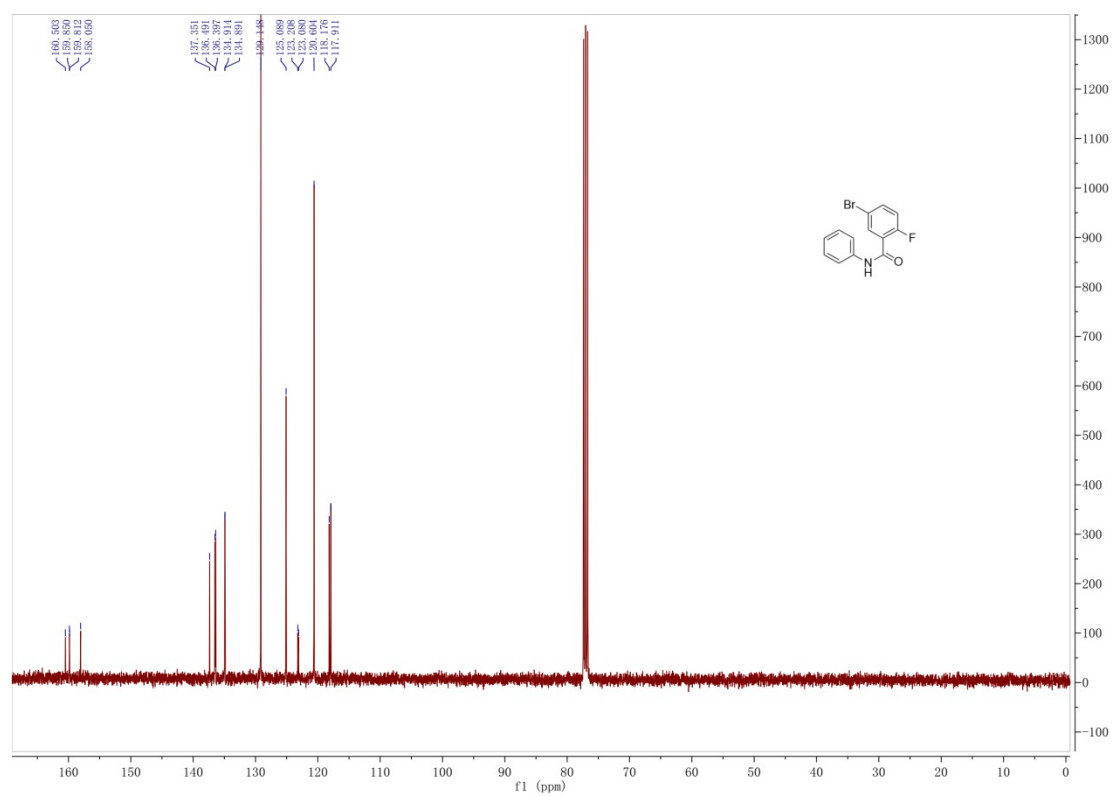



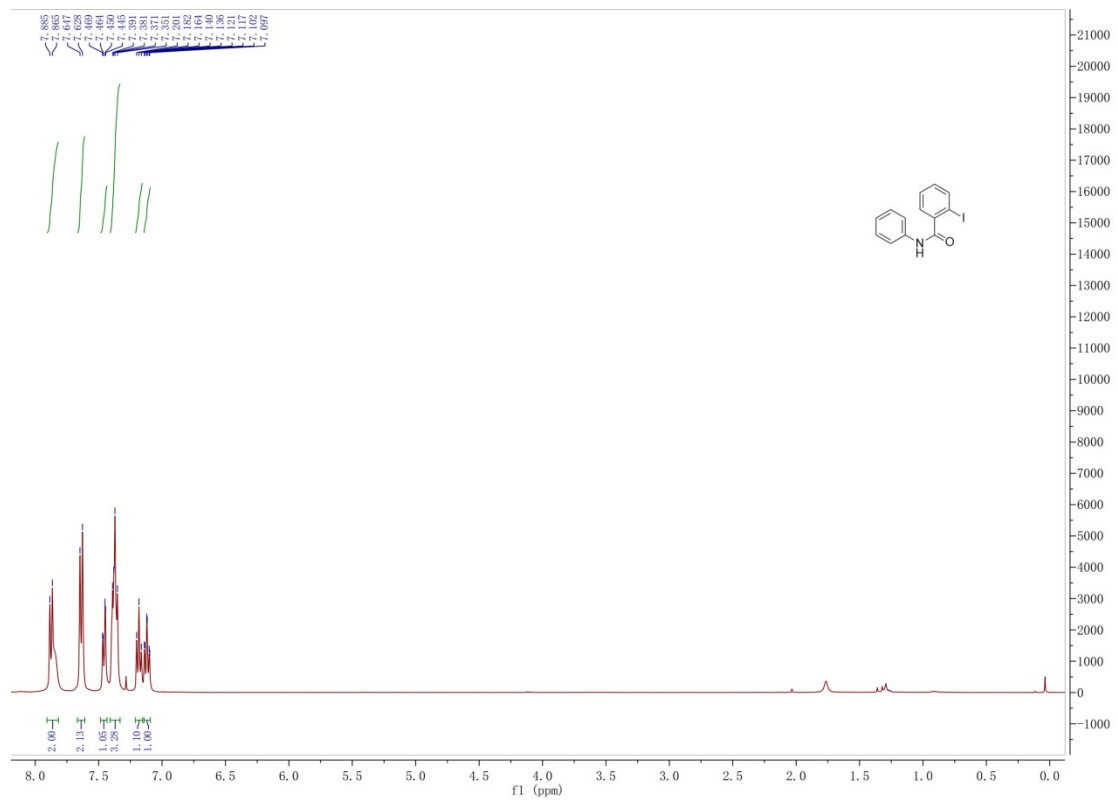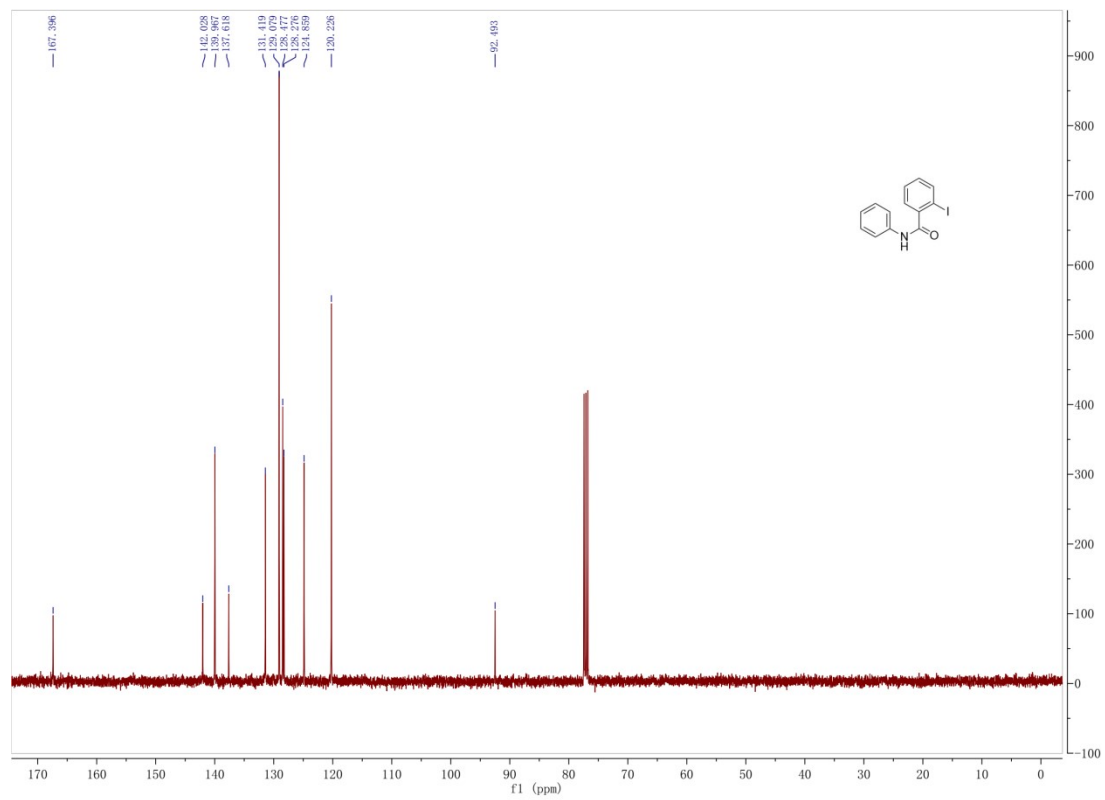

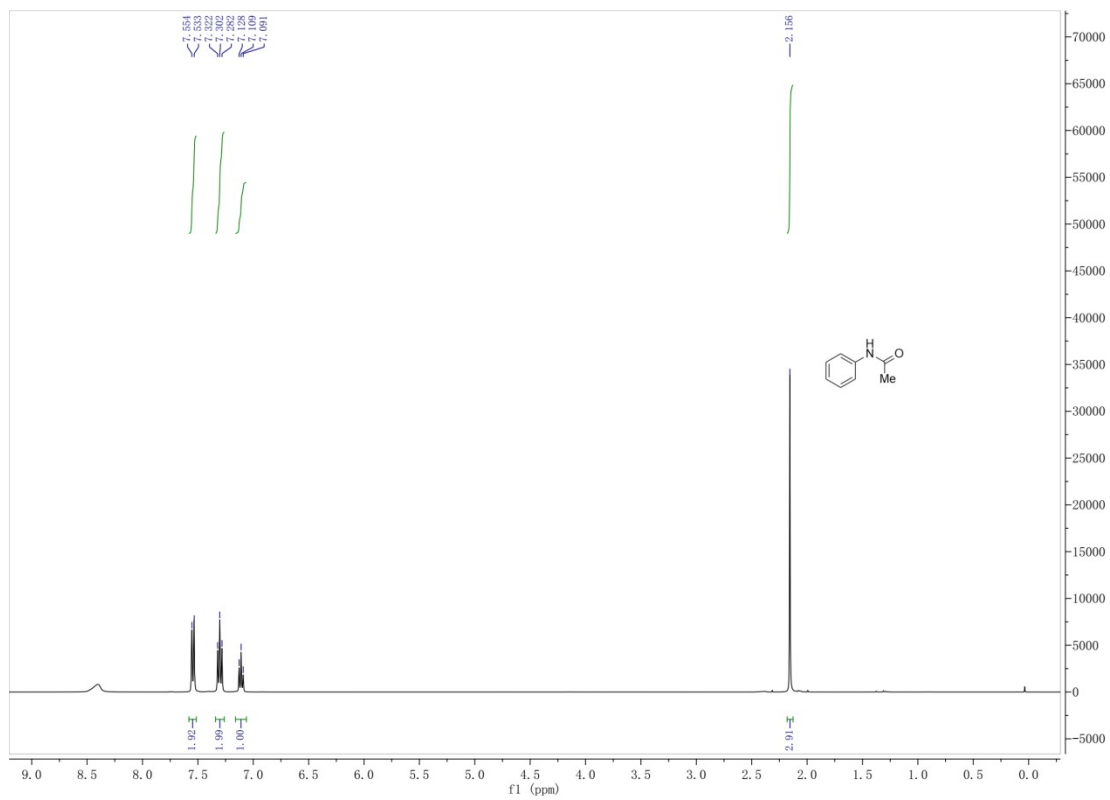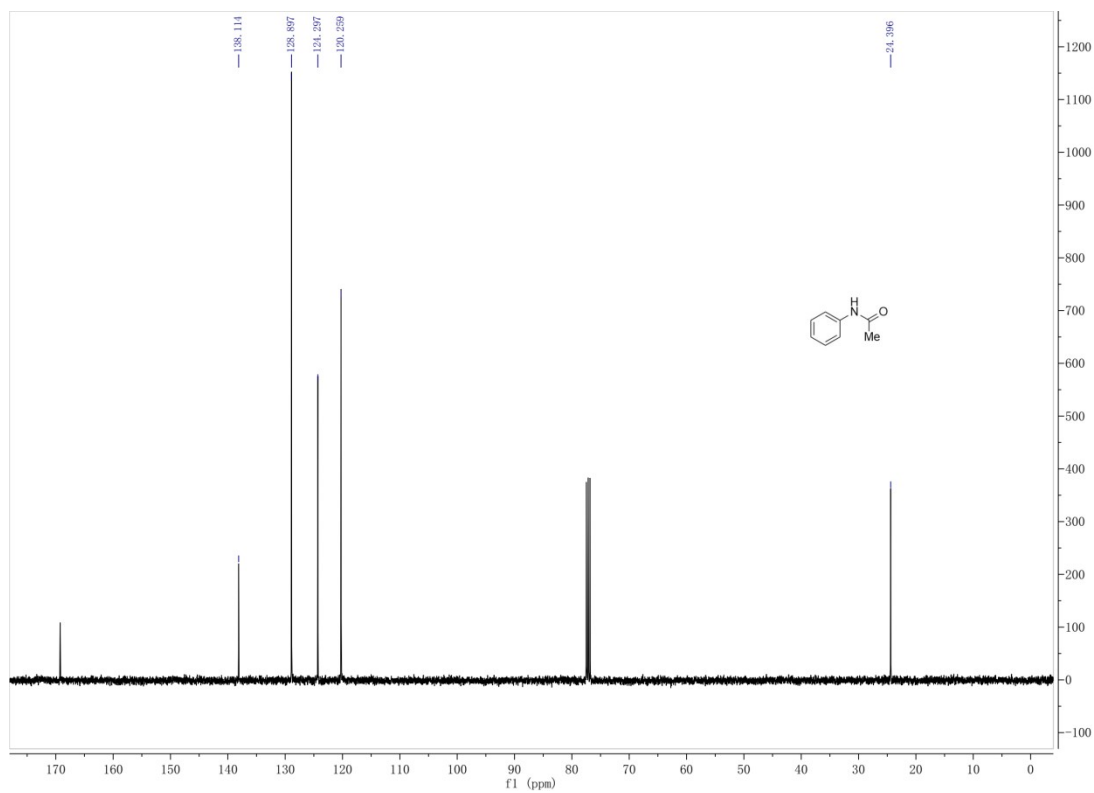

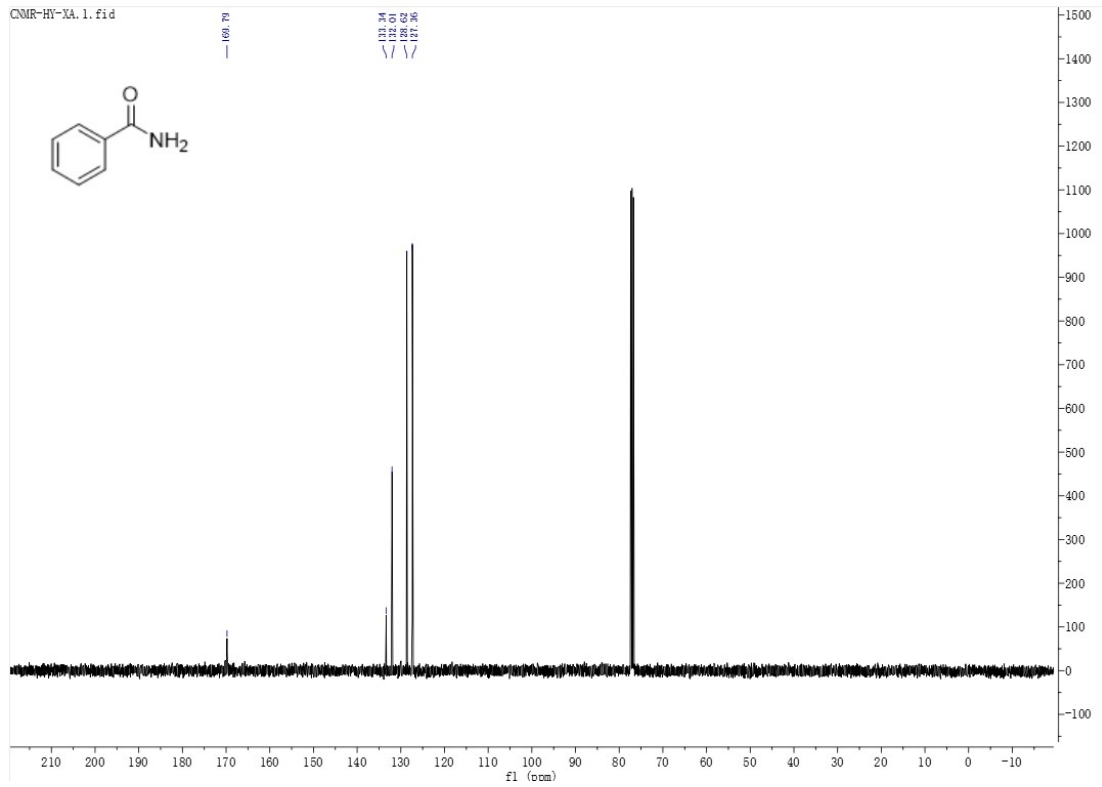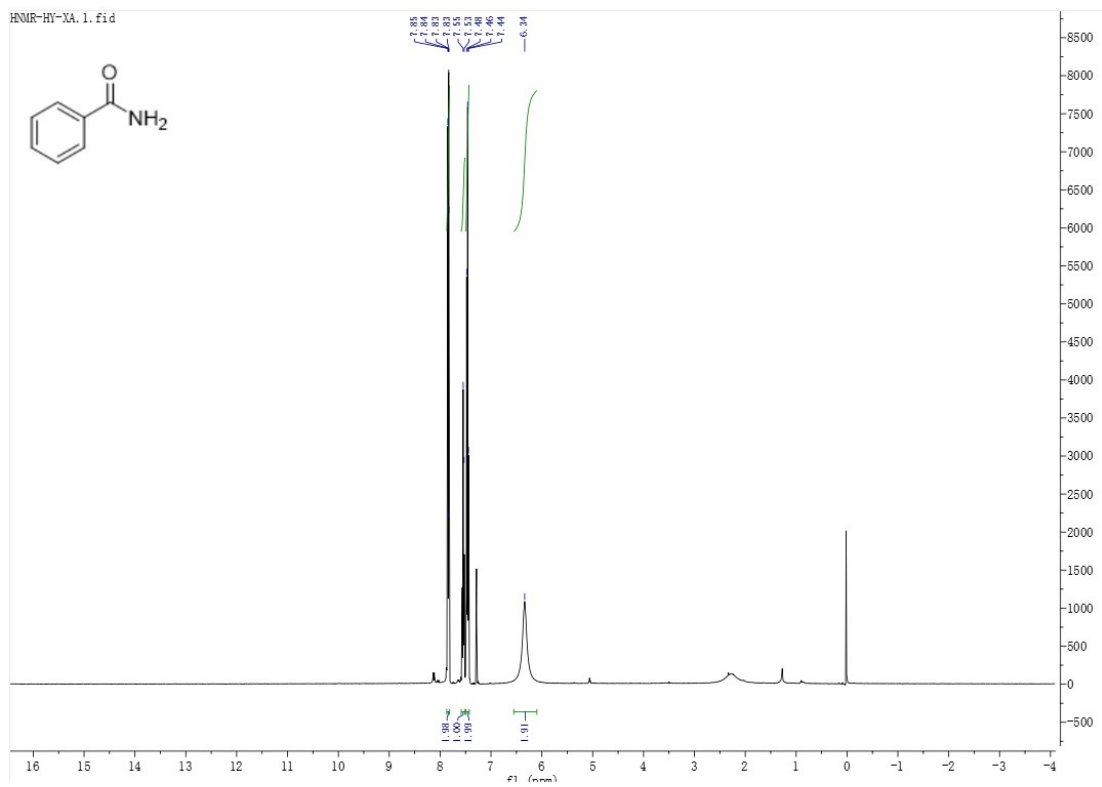

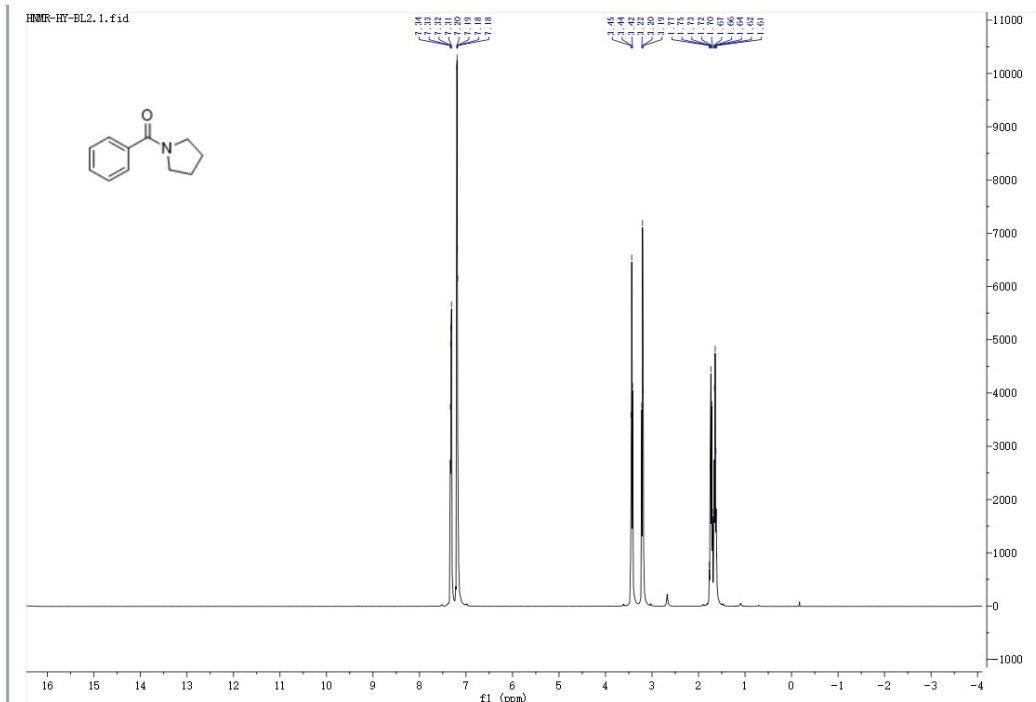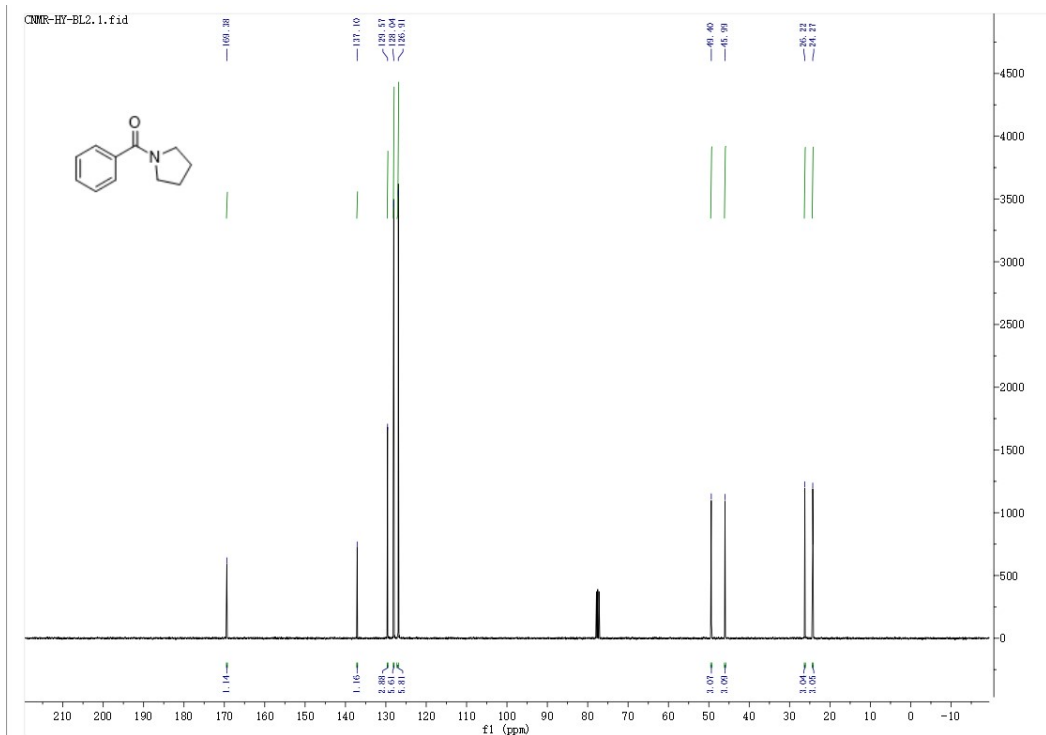

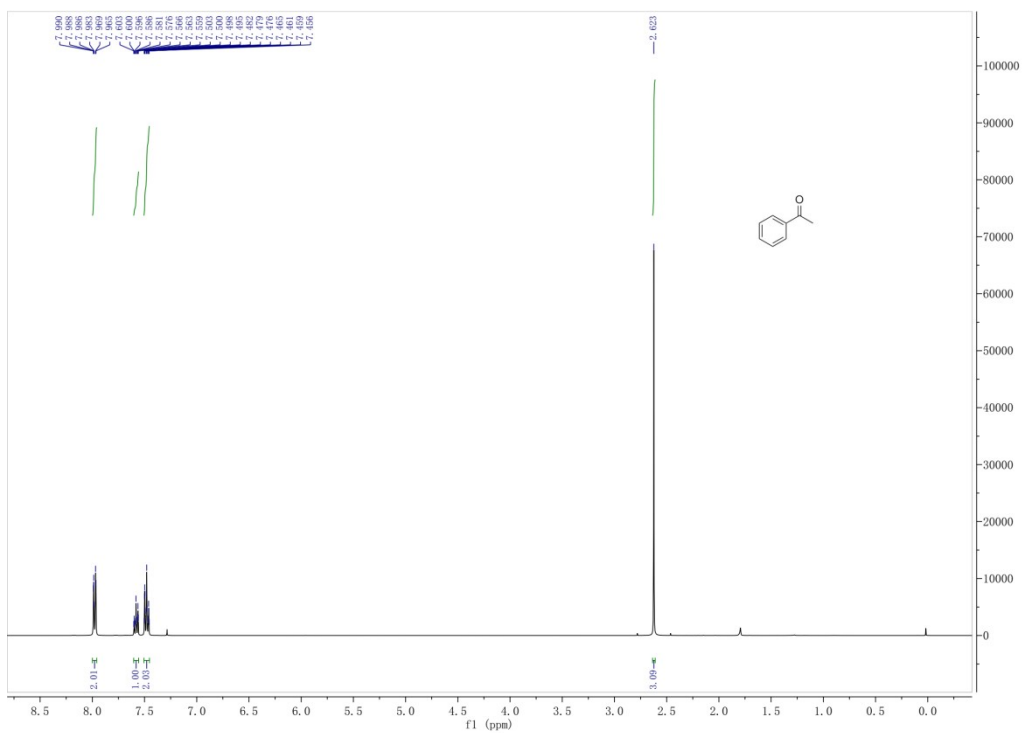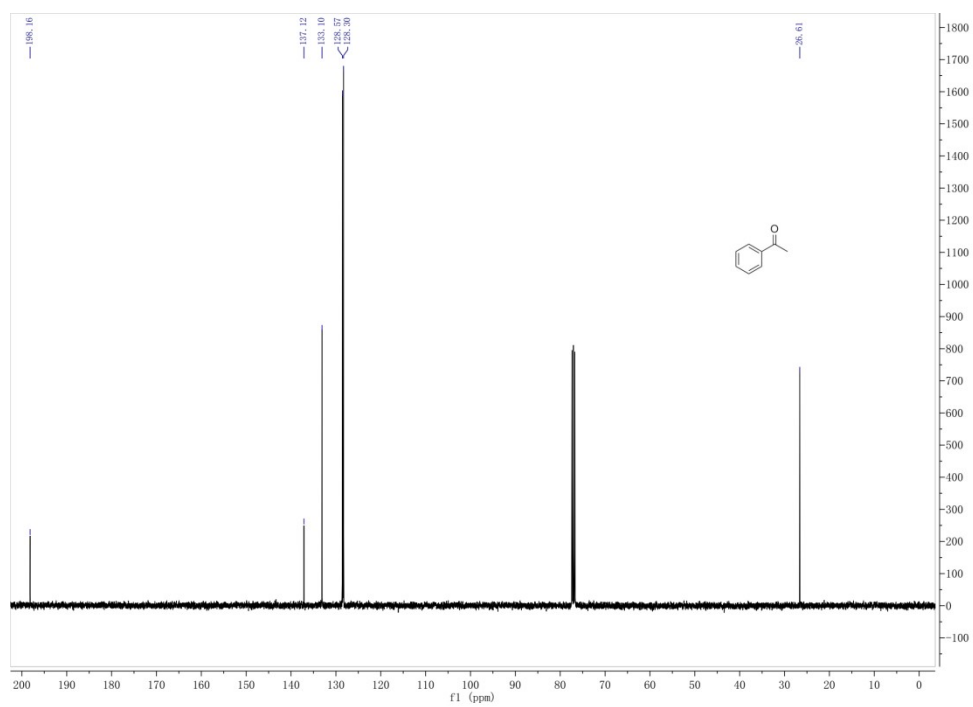

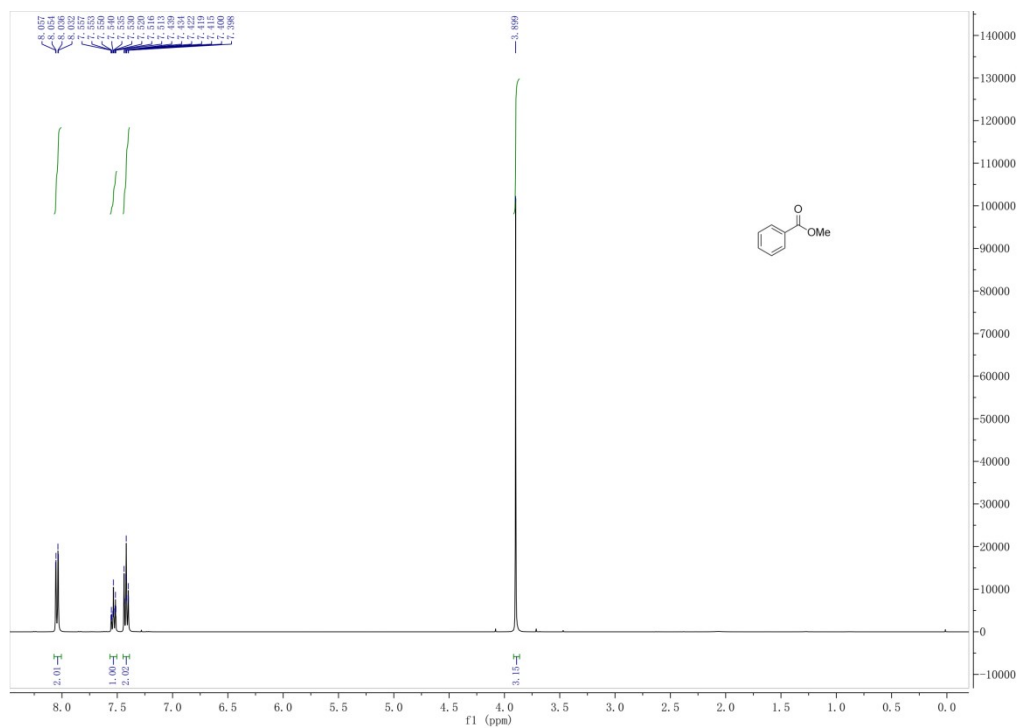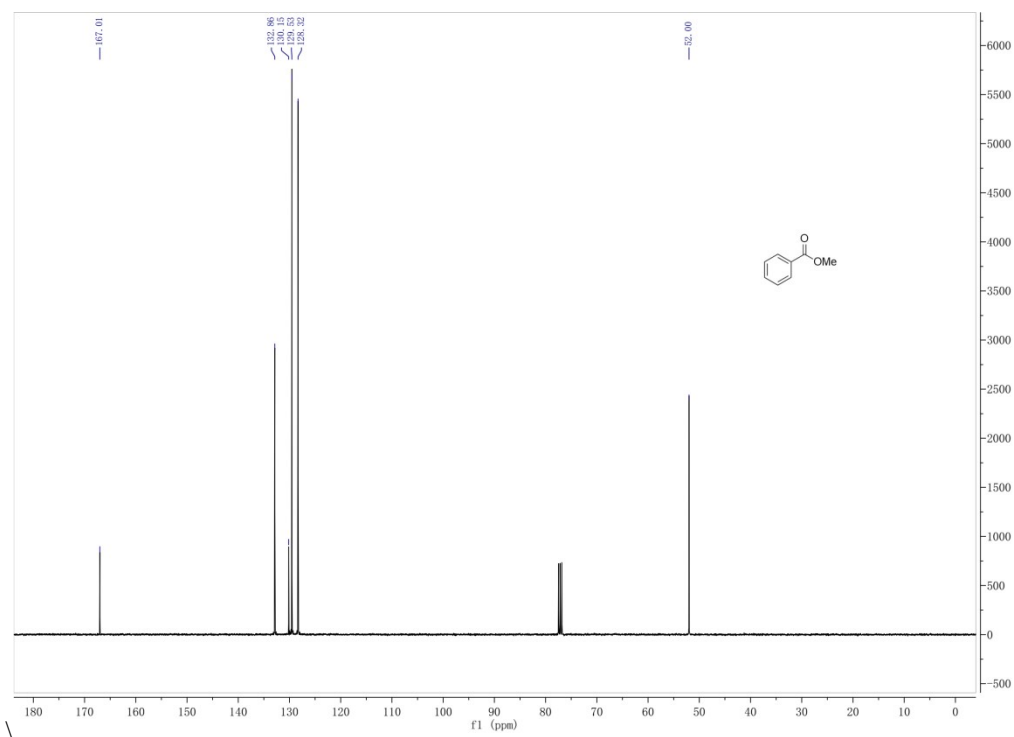

1. Y. Wang, D. Zhu, L. Tang, S. Wang and Z. Wang. *Angew. Chem. Int. Ed.*, 2011, **50**,8917-8921.
2. J.-C. Hsieh and C.-H. Cheng. *Chem. Commun.*, 2005, **36**,4554-4556.
3. K. Bahrami, M. M. Khodaei, V. Shakibaian, D. Khaledian and B. H. Yousefi, *J. Sulfur Chem.*, 2012, **33**, 155–163.
